# Supplementary material for: Incorporation of H2O and CO2 into a BN-embedded 3aH-3a1H-acephenanthrylene derivative
Source: Royal Society of Chemistry journal article supplement (doi:10.1039/d0cc07276a), 2020-12-28
Supplement: d0cc07276a1.pdf [file d0cc07276a1.pdf]

## Supplementary Information

### Incorporation of H<sub>2</sub>O and CO<sub>2</sub> into a BN-embedded 3aH-3a<sup>1</sup>H-acephenanthrylene derivative

#### Contents

1. Synthesis of compounds **2-5** and their spectral data
2. Control experiments
3. Crystallographic details
4. Computational details
5. References

## Method

**General.** All reactions were performed under an atmosphere of nitrogen by using standard Schlenk or dry box techniques; solvents were dried over Na metal, K metal or CaH<sub>2</sub>. <sup>1</sup>H, <sup>11</sup>B, <sup>13</sup>C and <sup>19</sup>F spectra were obtained with BRUKER AVANCE III HD 500MHz spectrometer at 298 K. NMR multiplicities are abbreviated as follows: s = singlet, d = doublet, t = triplet, m = multiplet, br = broad signal. Coupling constants *J* are given in Hz. Electrospray ionization (ESI) mass spectra were obtained at the Agilent Q-TOF6510 or Waters Q-ToF Premier Mass Spectrometers. Fourier transform infrared (FT-IR) spectra were recorded on a Bruker ALPHA II FTIR spectrometer. Melting points were measured on a X4 Melting Point apparatus (Beijing Tech, CN) in sealed capillaries and are uncorrected. H<sub>2</sub>O•B(C<sub>6</sub>F<sub>5</sub>)<sub>3</sub><sup>S1</sup> were synthesized according to literature procedures.

### Synthesis of compounds 2-5 and their spectral data

**Compound 2:** 0.428 g (0.5 mmol) **1** were dissolved in toluene (10 mL) and a toluene solution of H<sub>2</sub>O•B(C<sub>6</sub>F<sub>5</sub>)<sub>3</sub> (0.265 g, 0.5 mmol) was added dropwise at -60 °C. The solution turned from yellow to colourless immediately. The solvents were removed under vacuum at low temperature and the residue was washed with n-hexane to afford a pale yellow powder. The resulting solid was re-dissolved with toluene and co-product IPr<sub>2</sub>Me<sub>2</sub>-B(C<sub>6</sub>F<sub>5</sub>)<sub>3</sub> was present as yellow oil at the bottom of reaction flask after an addition of n-hexane. The upper clear solution was collected and vacuumed and the residue was extracted with hot n-hexane to afford a white powder of **2** in 90 % yield (0.311 g).

Mp: 122.1 °C (dec); <sup>1</sup>H NMR (500 MHz, CDCl<sub>3</sub>): δ = 7.38 (t, *J* = 7.5 Hz, 1H, Ar-*H*), 7.26 (t, *J* = 7.5 Hz, 1H, Ar-*H*), 7.17 (d, *J* = 7.1 Hz, 1H, Ar-*H*), 7.12 (d, *J* = 7.5 Hz, 1H, Ar-*H*), 7.01 (d,

$J = 7.3$  Hz, 1H, Ar-*H*), 6.97 (s, 2H, Ar-*H*), 6.92 (s, 1H, Ar-*H*), 6.83 (s, 2H, Ar-*H*), 6.80 (s, 1H, Ar-*H*), 6.76 (d,  $J = 7.4$  Hz, 1H, Ar-*H*), 6.08 (s, 1H, Ar-*H*), 5.29 (s, 1H, C-*H*), 2.71 (s, 1H, O-*H*), 2.34 (s, 3H, CH<sub>3</sub>), 2.30 (s, 3H, CH<sub>3</sub>), 2.23 (s, 3H, CH<sub>3</sub>), 2.20 (s, 3H, CH<sub>3</sub>), 1.99 (s, 3H, CH<sub>3</sub>), 1.98 (s, 4H, CH<sub>3</sub> + CH), 1.93 (s, 3H, CH<sub>3</sub>), 1.90 (s, 3H, CH<sub>3</sub>), 1.89 (s, 3H, CH<sub>3</sub>), 1.75 (s, 3H, CH<sub>3</sub>), 1.50 (s, 3H, CH<sub>3</sub>), 1.42 (s, 1H, N-*H*), 0.69 (s, 3H, CH<sub>3</sub>); <sup>13</sup>C NMR (126 MHz, CDCl<sub>3</sub>):  $\delta = 145.5$  (C<sup>q</sup>), 145.1 (C<sup>q</sup>), 144.0 (C<sup>q</sup>), 143.9 (C<sup>q</sup>), 140.4 (C<sup>q</sup>), 140.1 (C<sup>q</sup>), 139.2 (C<sup>q</sup>), 137.2 (C<sup>q</sup>), 137.2 (C<sup>q</sup>), 136.8 (C<sup>q</sup>), 136.7 (C<sup>q</sup>), 136.7 (C<sup>q</sup>), 136.25 (C<sup>q</sup>), 135.6 (C<sup>q</sup>), 135.4 (C<sup>q</sup>), 135.2 (C<sup>q</sup>), 135.0 (C<sup>q</sup>), 129.91 (C<sup>q</sup>), 129.0 (CH), 129.0 (CH), 128.9 (CH), 128.6 (CH), 128.5 (CH), 128.5 (CH), 128.1 (CH), 128.0 (CH), 128.0 (CH), 127.9 (CH), 126.8 (CH), 123.8 (C<sup>q</sup>), 121.2 (CH), 60.0 (N-C<sup>q</sup>), 48.2 (B-CH), 30.9 (CH<sub>3</sub>), 24.1 (CH<sub>3</sub>), 22.1 (CH<sub>3</sub>), 21.3 (CH<sub>3</sub>), 21.1 (CH<sub>3</sub>), 21.0 (CH<sub>3</sub>), 21.0 (CH<sub>3</sub>), 21.0 (CH<sub>3</sub>), 21.0 (CH<sub>3</sub>), 19.9 (CH<sub>3</sub>), B-C was not observed; <sup>11</sup>B NMR (160 MHz, CDCl<sub>3</sub>):  $\delta = 39.3$  (br), 24.4 (br); HRMS (ESI):  $m/z$  calcd for C<sub>48</sub>H<sub>53</sub>B<sub>2</sub>N<sub>2</sub>O: 695.4344 [(M + H)]<sup>+</sup>; found: 695.4371.

**Compound 3:** 0.428 g (0.5 mmol) **1** were dissolved in toluene (30 mL) and a toluene solution of H<sub>2</sub>O•B(C<sub>6</sub>F<sub>5</sub>)<sub>3</sub> (0.265 g, 0.5 mmol) was added at room temperature. The mixture was stirred for 3.5 h and all volatiles were removed under vacuum. The residue was washed by cold toluene to afford a white solid of **3** (0.212g, 35 %).

Mp: 156.2 °C (dec); <sup>1</sup>H NMR (500 MHz, CDCl<sub>3</sub>):  $\delta = 7.45$ –7.38 (m, 2H, Ar-*H*), 7.26 (d, 2H, Ar-*H*), 7.20 (d, 1H, Ar-*H*), 6.99 (s, 1H, Ar-*H*), 6.86 (s, 2H, Ar-*H*), 6.78 (d, 1H, Ar-*H*), 6.76 (s, 1H, Ar-*H*), 6.71 (m,  $J = 6.6$  Hz, 2H, Ar-*H*), 6.48 (s, 1H, Ar-*H*), 5.87 (s, 1H, Ar-*H*), 5.49 (s, 1H, C-*H*), 3.77–3.63 (m, 2H, CH(CH<sub>3</sub>)<sub>2</sub>), 2.30 (s, 3H, CH<sub>3</sub>), 2.25 (s, 3H, CH<sub>3</sub>), 2.24 (s, 3H, CH<sub>3</sub>), 2.23 (s, 6H, CH<sub>3</sub>), 2.21 (s, 3H, CH<sub>3</sub>), 1.94 (s, 3H, CH<sub>3</sub>), 1.90 (s, 1H, C-*H*), 1.88 (s, 3H,

$CH_3$ ), 1.84 (s, 3H,  $CH_3$ ), 1.79 (s, 3H,  $CH_3$ ), 1.74 (s, 1H, N- $H$ ), 1.65 (s, 3H,  $CH_3$ ), 1.63 (s, 3H,  $CH_3$ ), 1.59 (s, 3H,  $CH_3$ ), 1.27 (d,  $J = 6.8$  Hz, 3H,  $CH_3$ ), 1.05 (d,  $J = 7.0$  Hz, 3H,  $CH_3$ ), 0.81 (d,  $J = 6.8$  Hz, 3H,  $CH_3$ ), 0.79 (s, 3H,  $CH_3$ ), 0.44 (d,  $J = 6.9$  Hz, 3H,  $CH_3$ );  $^{13}C$  NMR (126 MHz,  $CDCl_3$ ):  $\delta = 145.5$  ( $C^q$ ), 145.4 ( $C^q$ ), 144.3 ( $C^q$ ), 141.3 ( $C^q$ ), 140.2 ( $C^q$ ), 139.1 ( $C^q$ ), 138.9 ( $C^q$ ), 138.0 ( $C^q$ ), 137.4 ( $C^q$ ), 136.9 ( $C^q$ ), 136.2 ( $C^q$ ), 136.2 ( $C^q$ ), 136.2 ( $C^q$ ), 135.8 ( $C^q$ ), 135.4 ( $C^q$ ), 134.9 ( $C^q$ ), 134.3 ( $C^q$ ), 130.8 (CH), 129.8 (CH), 129.6 (CH), 129.4 (CH), 129.2 (CH), 129.1 (CH), 129.0 (CH), 129.0 ( $C^q$ ), 128.3 (CH), 128.2 (CH), 127.7 ( $C^q$ ), 127.2 (CH), 127.1 ( $C^q$ ), 126.8 ( $C^q$ ), 121.3 (CH), 64.3 (N- $C^q$ ), 54.4 ( $CH(CH_3)_2$ ), 53.5 ( $CH(CH_3)_2$ ), 29.2 ( $CH_3$ ), 24.5 ( $CH_3$ ), 22.9 ( $CH_3$ ), 21.9 ( $CH_3$ ), 21.9 ( $CH_3$ ), 21.7 ( $CH_3$ ), 21.4 ( $CH_3$ ), 21.3 ( $CH_3$ ), 21.2 ( $CH_3$ ), 21.1 ( $CH_3$ ), 20.9 ( $CH_3$ ), 20.7 ( $CH_3$ ), 20.6 ( $CH_3$ ), 20.5 ( $CH_3$ ), 19.5 ( $CH_3$ ), 10.7 ( $CH_3$ ), 10.4 ( $CH_3$ ), B-CH was not observed;  $^{11}B$  NMR (160 MHz,  $CDCl_3$ ):  $\delta = 44.6$  (br), 26.5 (br),  $-3.8$  (s);  $^{19}F$  NMR (471 MHz,  $CDCl_3$ ):  $\delta = -135.42$  (d,  $J = 21.8$  Hz),  $-163.12$  (t,  $J = 20.3$  Hz),  $-166.43$  (m); HRMS (ESI):  $m/z$  calcd for  $C_{59}H_{71}B_2N_4$ : 857.5865 [(M)] $^+$ ; found: 857.5861.

**Compound 4:** 0.428 g (0.5 mmol) **1** were dissolved in toluene (10 mL) and 2 mL of a 1 M THF solution (2 mmol) of  $H_2O$  were added at room temperature. The mixture was stirred overnight and all volatiles were removed under vacuum. The residue was washed by n-hexane to afford a white solid of **4** (0.323 g, 72 %). All the NMR data were same as the reported literature.<sup>S2</sup>

$^1H$  NMR (500 MHz,  $C_6D_6$ ):  $\delta = 7.32$  (t,  $J = 7.5$  Hz, 2H, Ar- $H$ ), 7.05 (d,  $J = 7.5$  Hz, 4H, Ar- $H$ ), 6.87 (s, 8H, Ar- $H$ ), 3.47 (sept,  $J = 6.8$  Hz, 2H,  $CH(CH_3)_2$ ), 2.33 (s, 12H,  $CH_3$ ), 2.25 (s, 24H,  $CH_3$ ), 1.31 (s, 6H,  $CH_3$ ), 0.86 (d,  $J = 6.8$  Hz, 12H,  $CH_3$ ).  $^{13}C$  NMR (126 MHz,  $C_6D_6$ ):  $\delta = 144.3$  ( $C^q$ ), 142.2 ( $C^q$ ), 136.9 ( $C^q$ ), 134.7 ( $C^q$ ), 128.4 (NCHN), 127.9 (CH), 127.6 (CH), 126.8

(CH), 50.9 (NCH(CH<sub>3</sub>)<sub>2</sub>), 21.6 (CH<sub>3</sub>), 21.5 (CH<sub>3</sub>), 21.4 (CH<sub>3</sub>), 7.7 (CH<sub>3</sub>), B-C was not observed; <sup>11</sup>B NMR (160 MHz, C<sub>6</sub>D<sub>6</sub>): δ = 30.6 (br).

**Compound 5:** 0.428 g (0.5 mmol) **1** were dissolved in toluene (10 mL) and CO<sub>2</sub> was passed for 5 min at room temperature. After filtration, the filtrate was removed under vacuum and the residue was washed by n-hexane to afford a white solid of **5** in 72 % yield (0.260 g).

Mp: 154.8 °C (dec); <sup>1</sup>H NMR (500 MHz, C<sub>6</sub>D<sub>6</sub>): δ = 7.24 – 7.17 (m, 3H, Ar-H), 7.09 (dd, *J* = 7.5, 0.8 Hz, 1H, Ar-H), 7.04 – 7.01 (m, 1H, Ar-H), 6.88 (m, 1H, Ar-H), 6.85 (s, 1H, Ar-H), 6.79 (s, 1H, Ar-H), 6.67 (m, 3H, Ar-H), 6.57 (s, 1H, Ar-H), 4.99 (s, 1H, C-H), 2.45 (s, 1H, C-H), 2.38 (s, 3H, CH<sub>3</sub>), 2.20 (s, 3H, CH<sub>3</sub>), 2.18 (s, 3H, CH<sub>3</sub>), 2.15 (s, 3H, CH<sub>3</sub>), 2.13 (s, 3H, CH<sub>3</sub>), 2.09 (s, 3H, CH<sub>3</sub>), 2.06 (s, 3H, CH<sub>3</sub>), 2.02 (s, 3H, CH<sub>3</sub>), 1.80 (s, 3H, CH<sub>3</sub>), 1.73 (s, 3H, CH<sub>3</sub>), 1.62 (s, 3H, CH<sub>3</sub>), 1.13 (s, 3H, CH<sub>3</sub>); <sup>13</sup>C NMR (126 MHz, C<sub>6</sub>D<sub>6</sub>): δ = 151.7 (CO), 146.4 (C<sup>q</sup>), 145.2 (C<sup>q</sup>), 144.4 (C<sup>q</sup>), 144.2 (C<sup>q</sup>), 139.1 (C<sup>q</sup>), 139.0 (C<sup>q</sup>), 138.8 (C<sup>q</sup>), 138.6 (C<sup>q</sup>), 137.0 (C<sup>q</sup>), 136.9 (C<sup>q</sup>), 136.8 (C<sup>q</sup>), 136.6 (C<sup>q</sup>), 136.2 (C<sup>q</sup>), 135.7 (C<sup>q</sup>), 135.4 (C<sup>q</sup>), 135.0 (C<sup>q</sup>), 131.6 (C<sup>q</sup>), 131.1 (CH), 129.9 (CH), 129.6 (CH), 129.1 (CH), 129.0 (CH), 128.7 (CH), 128.7 (CH), 128.6 (CH), 128.5 (CH), 128.4 (CH), 128.0 (CH), 127.9 (CH), 126.5 (C<sup>q</sup>), 122.9 (CH), 59.0 (C<sup>q</sup>), 56.4 (B-CH), 29.8 (CH<sub>3</sub>), 26.0 (CH<sub>3</sub>), 22.8 (CH<sub>3</sub>), 22.1 (CH<sub>3</sub>), 21.5 (CH<sub>3</sub>), 21.2 (CH<sub>3</sub>), 21.1 (CH<sub>3</sub>), 21.0 (CH<sub>3</sub>), 20.9 (CH<sub>3</sub>), 20.8 (CH<sub>3</sub>), 20.7 (CH<sub>3</sub>), 19.1 (CH<sub>3</sub>), B-C was not observed; <sup>11</sup>B NMR (160 MHz, C<sub>6</sub>D<sub>6</sub>): δ = 48.9 (br), 32.6 (br); HRMS (ESI): *m/z* calcd for C<sub>49</sub>H<sub>51</sub>B<sub>2</sub>N<sub>2</sub>O<sub>2</sub>: 721.4137 [(M + H)]<sup>+</sup>; found: 721.4127.

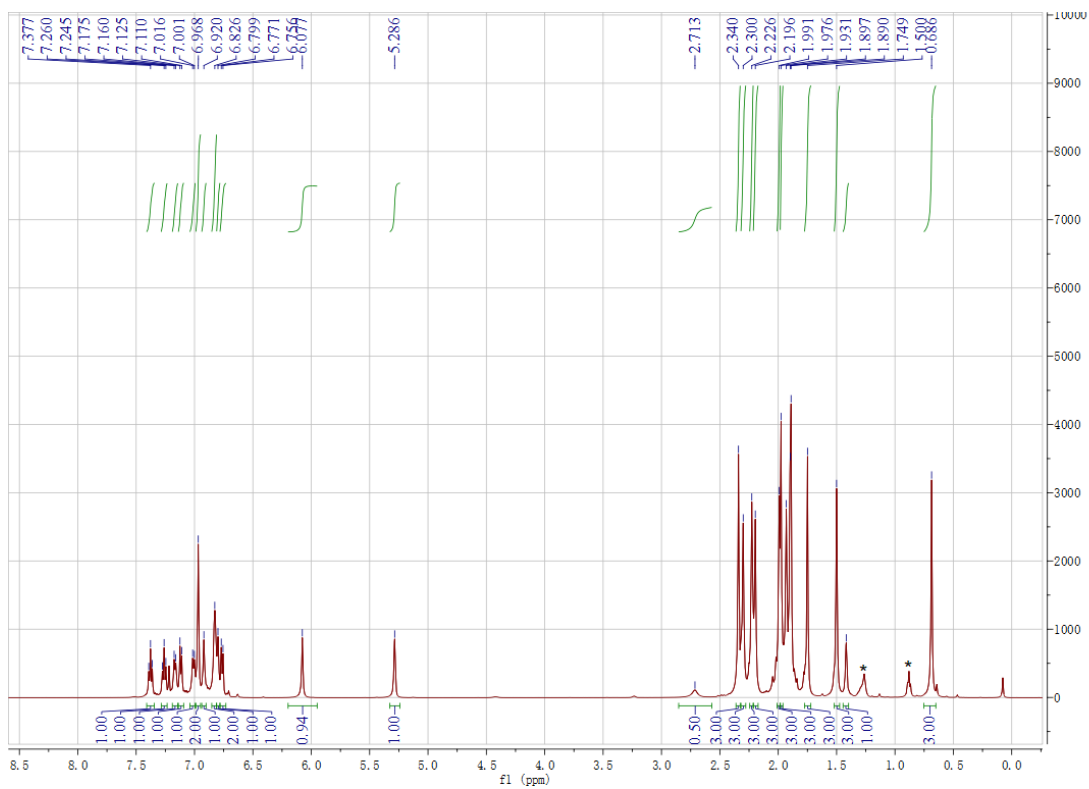

Fig. S1  $^1\text{H}$  NMR spectrum of **2**. (\*n-hexane)

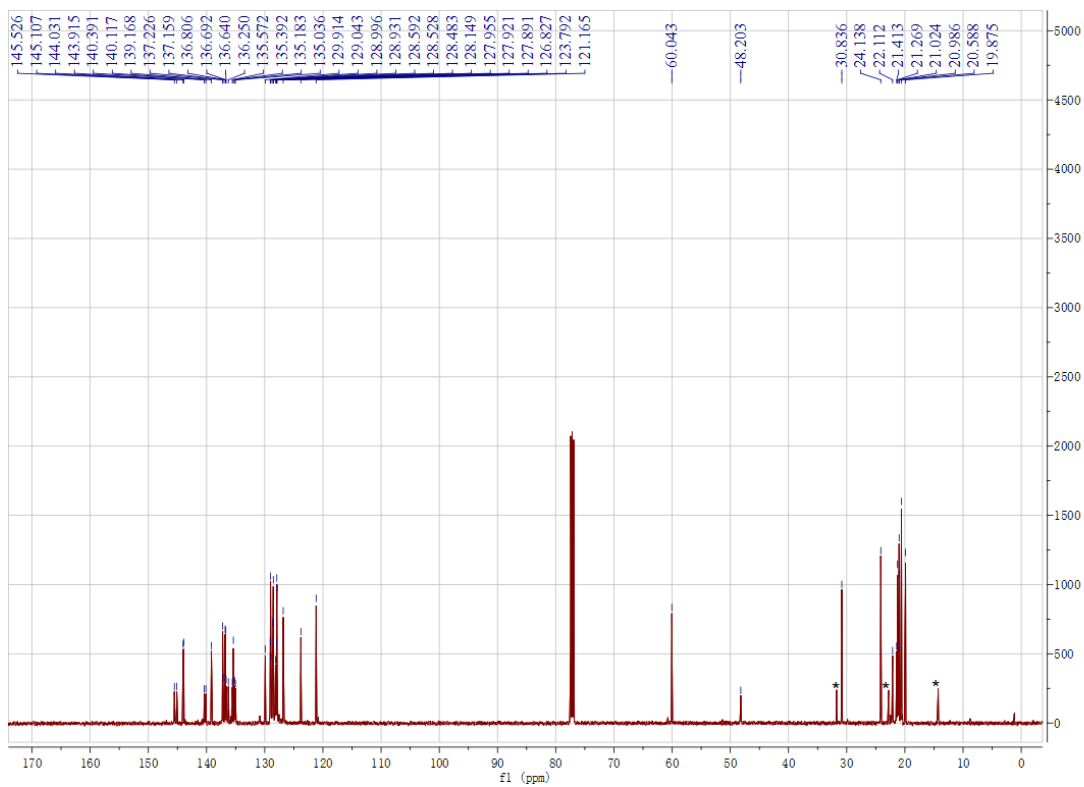

Fig. S2  $^{13}\text{C}$  NMR spectrum of **2**. (\*n-hexane)

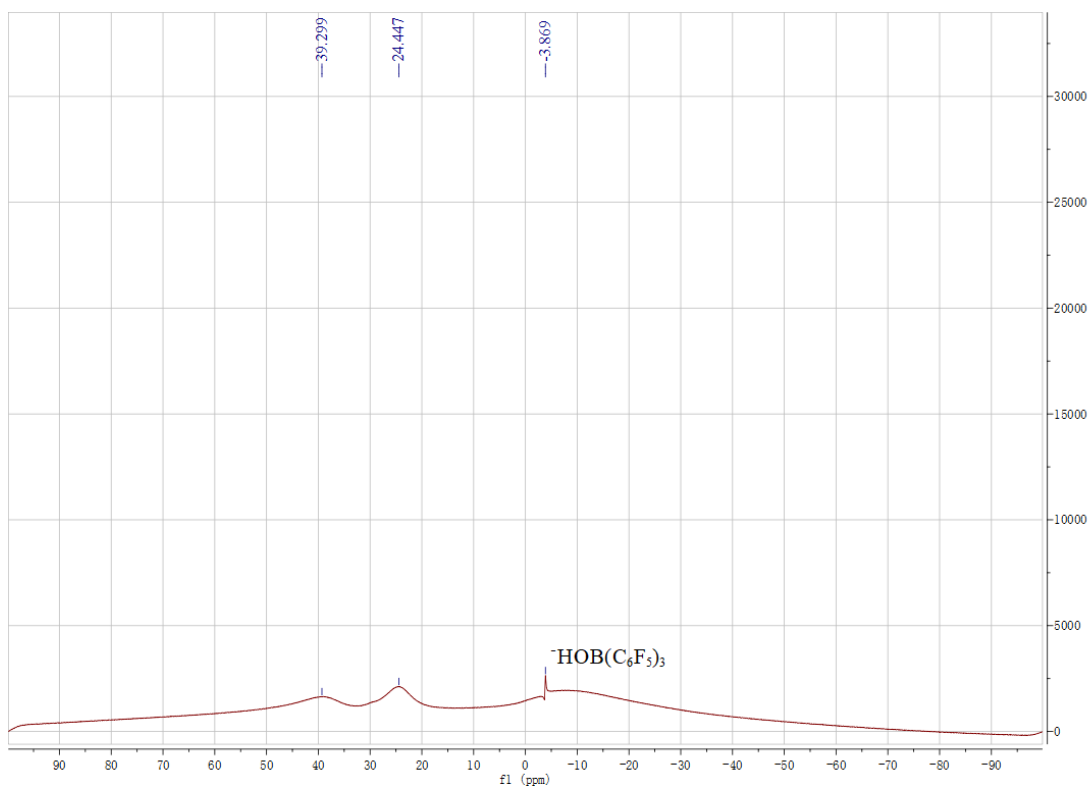

Fig. S3  $^{11}\text{B}$  NMR spectrum of 2.

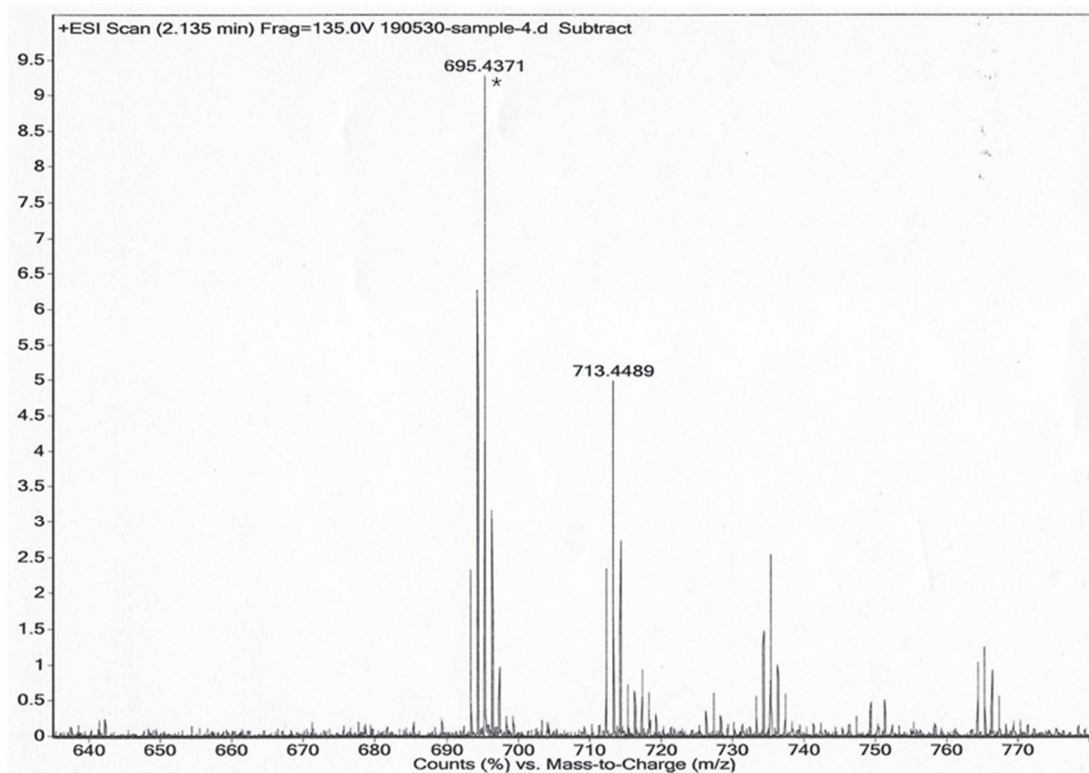

Fig. S4 HRMS spectrum of 2.

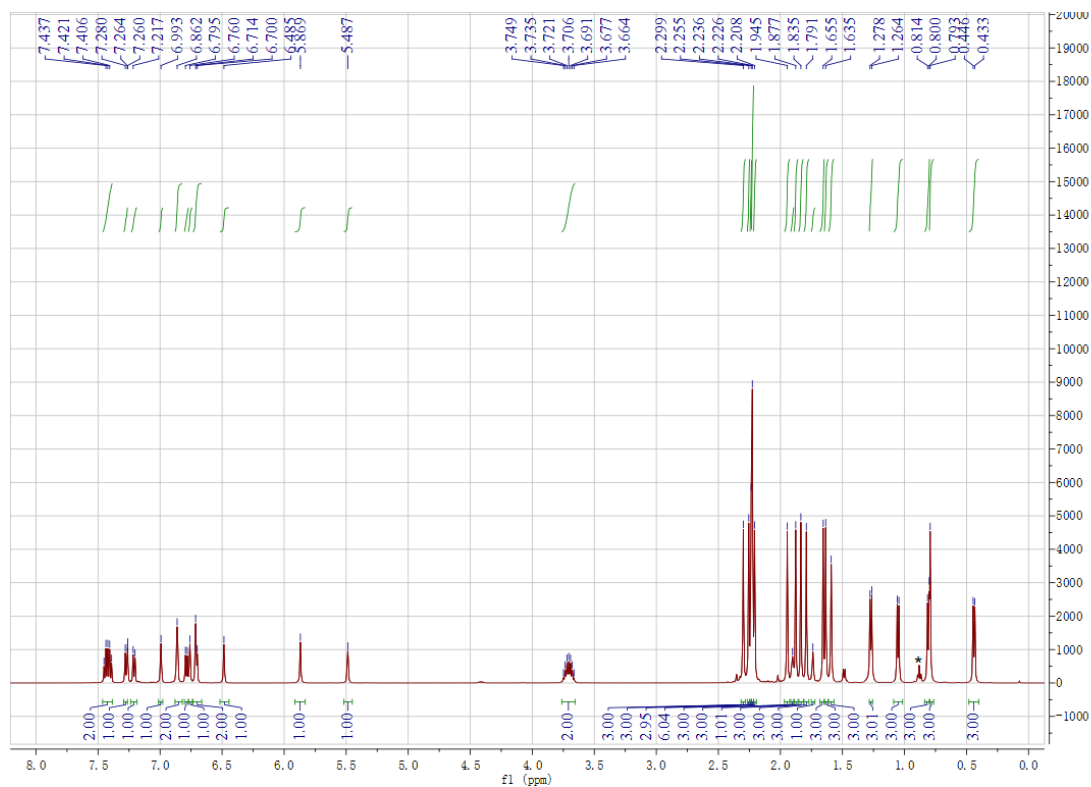

Fig. S5  $^1\text{H}$  NMR spectrum of **3**. (\*n-hexane)

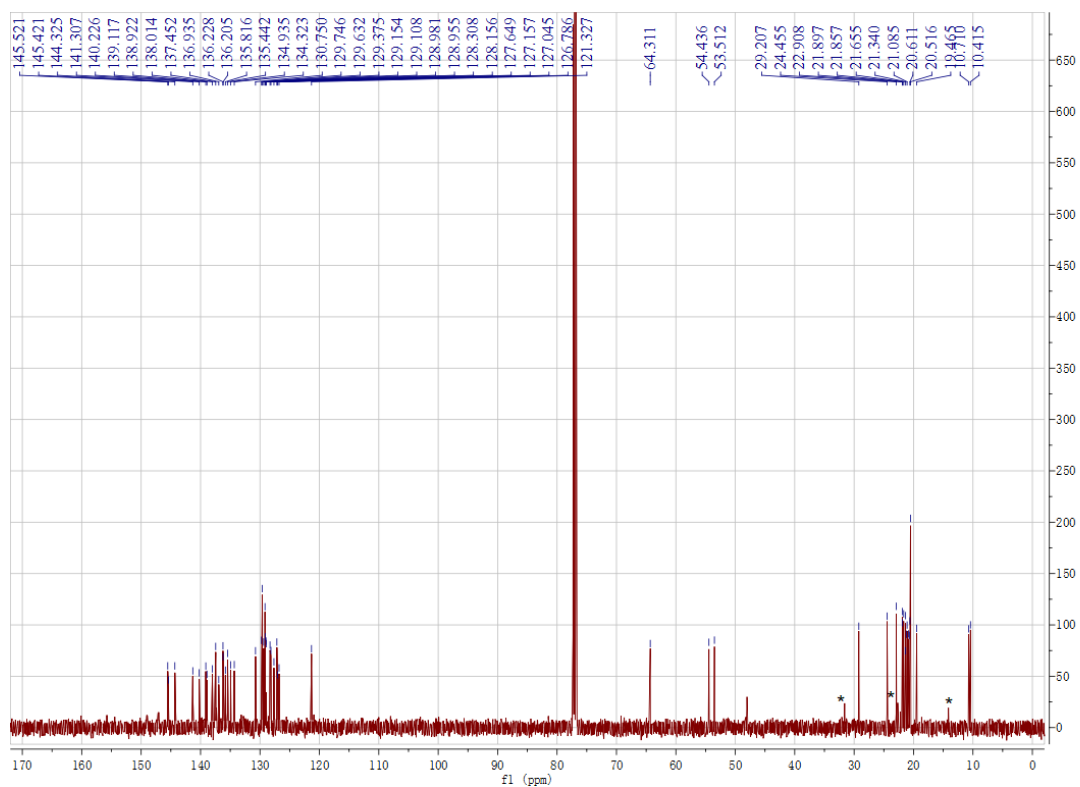

Fig. S6  $^{13}\text{C}$  NMR spectrum of **3**. (\*n-hexane)



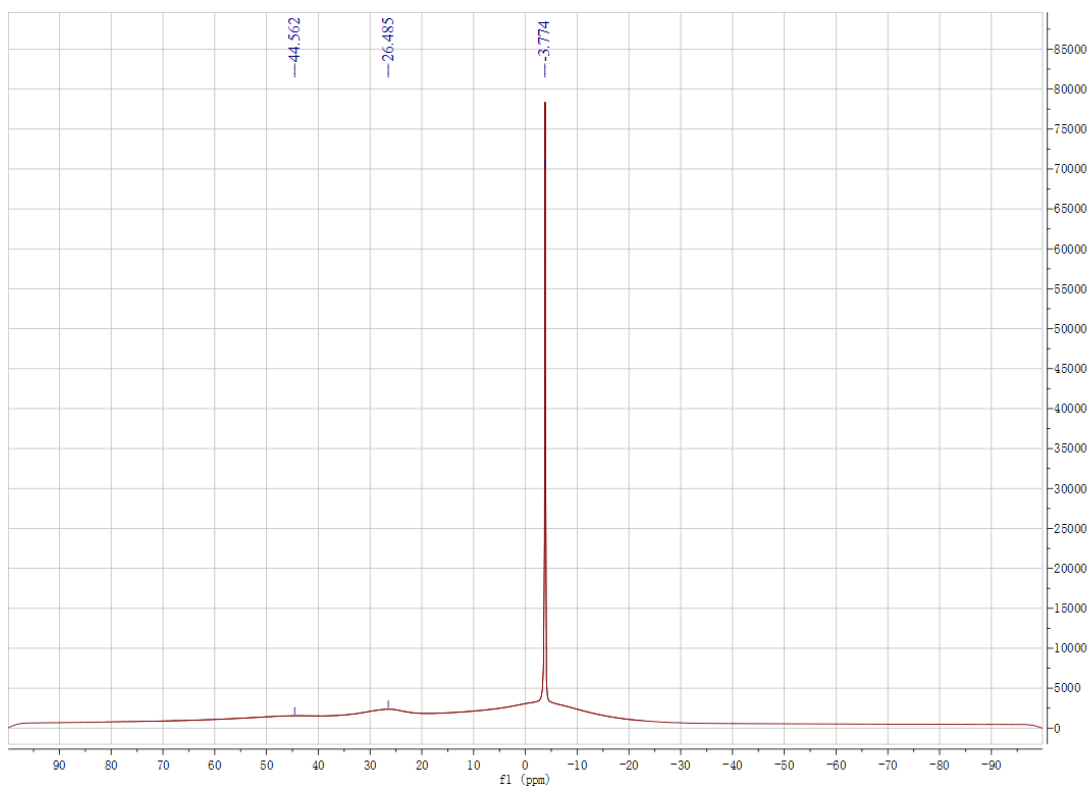

Fig. S7 <sup>11</sup>B NMR spectrum of 3.

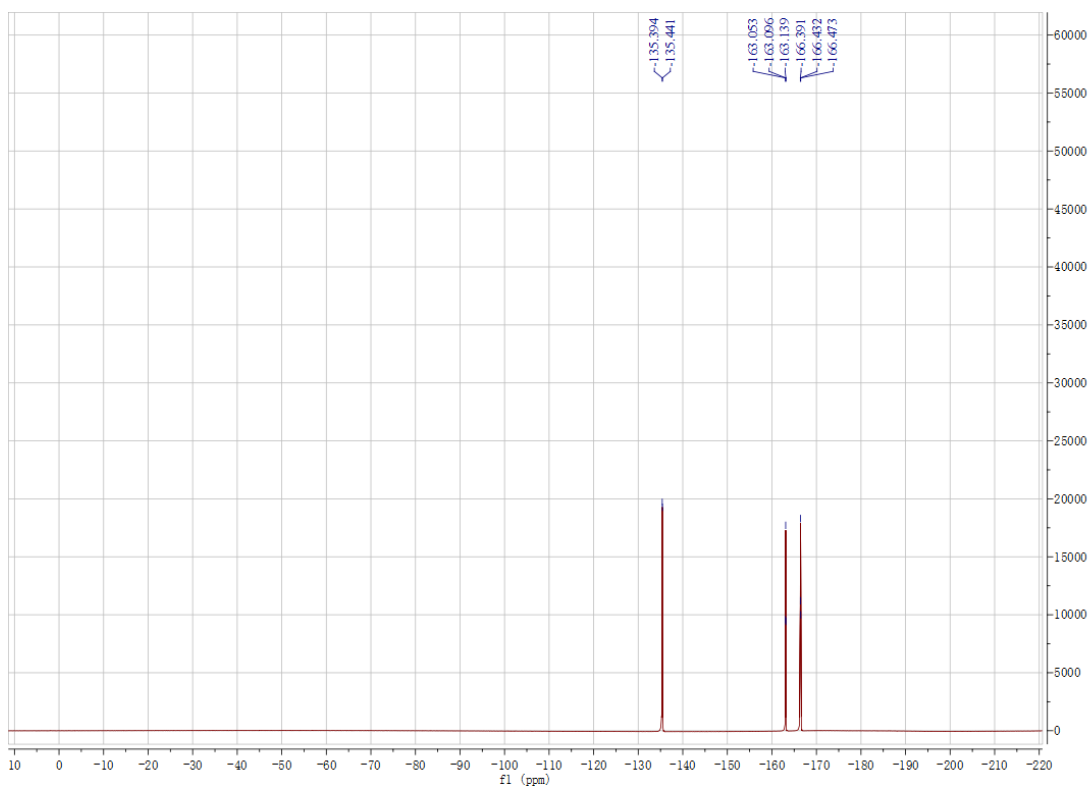

Fig. S8 <sup>19</sup>F NMR spectrum of 3.

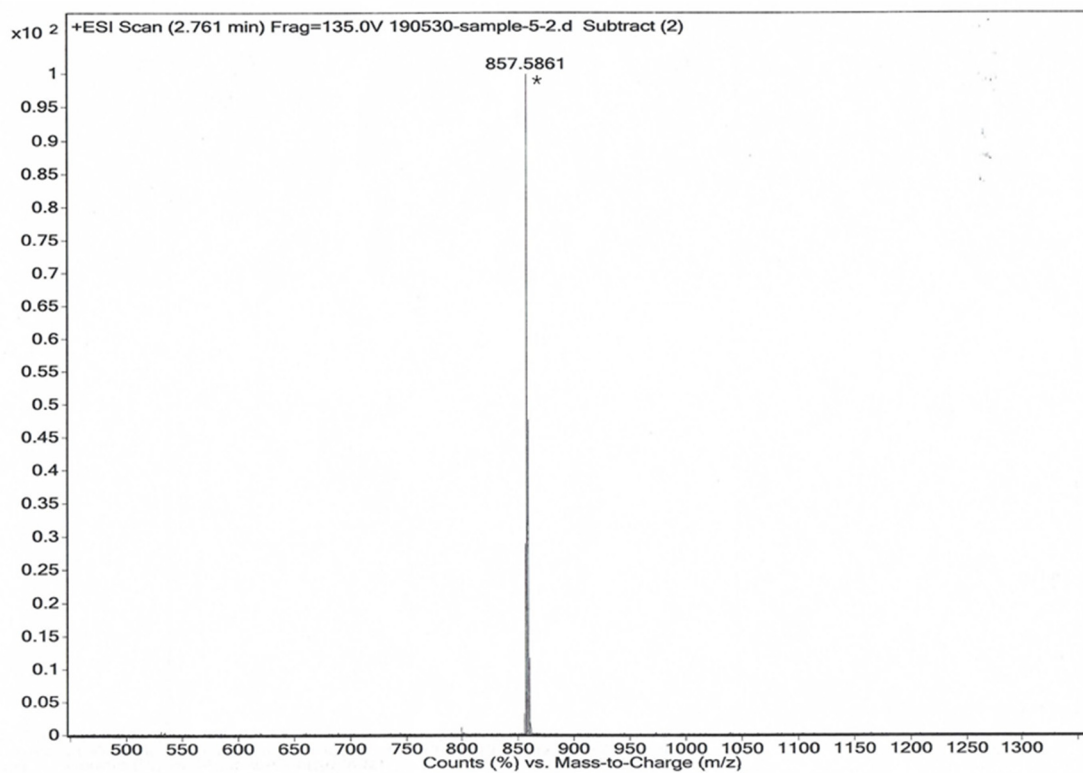

Fig. S9 HRMS spectrum of 3.

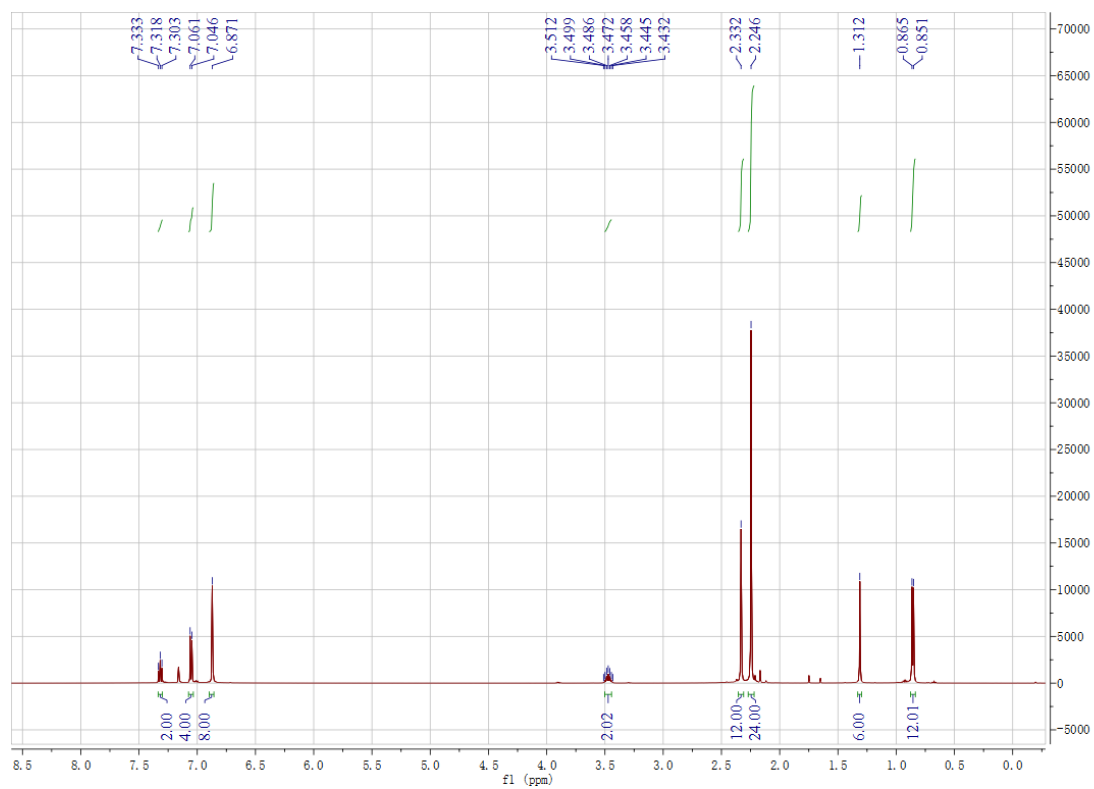

Fig. S10 <sup>1</sup>H NMR spectrum of 4.

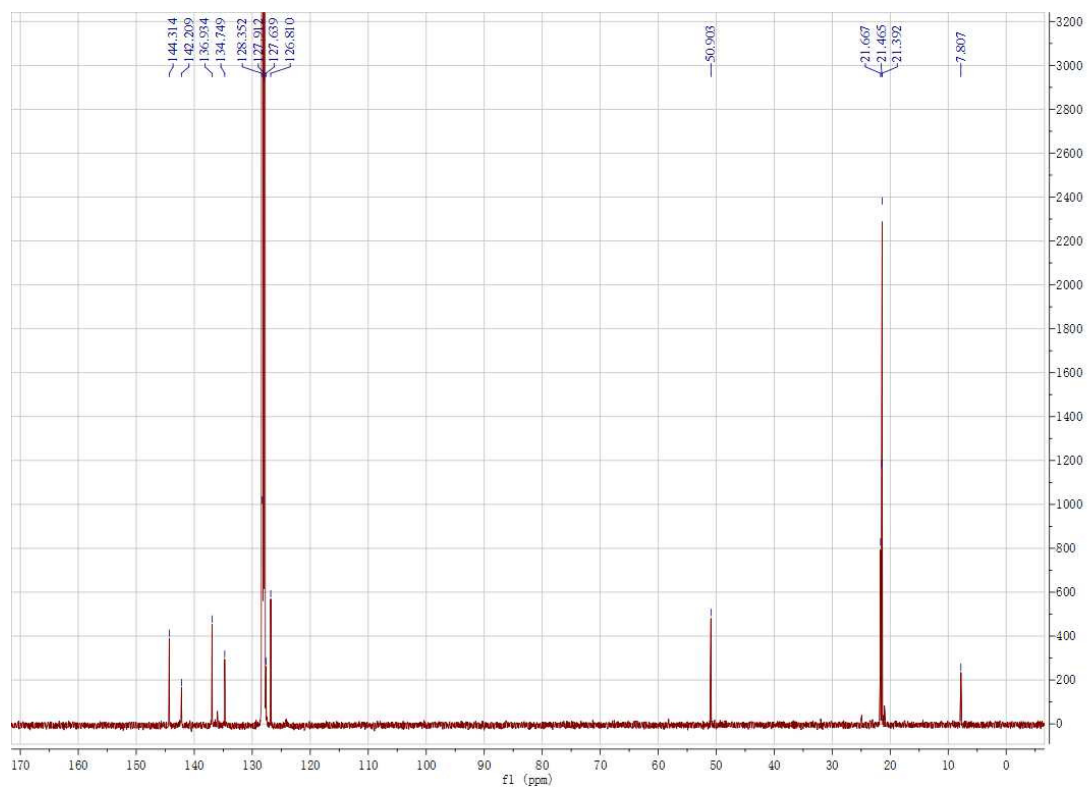

Fig. S11 <sup>13</sup>C NMR spectrum of 4.

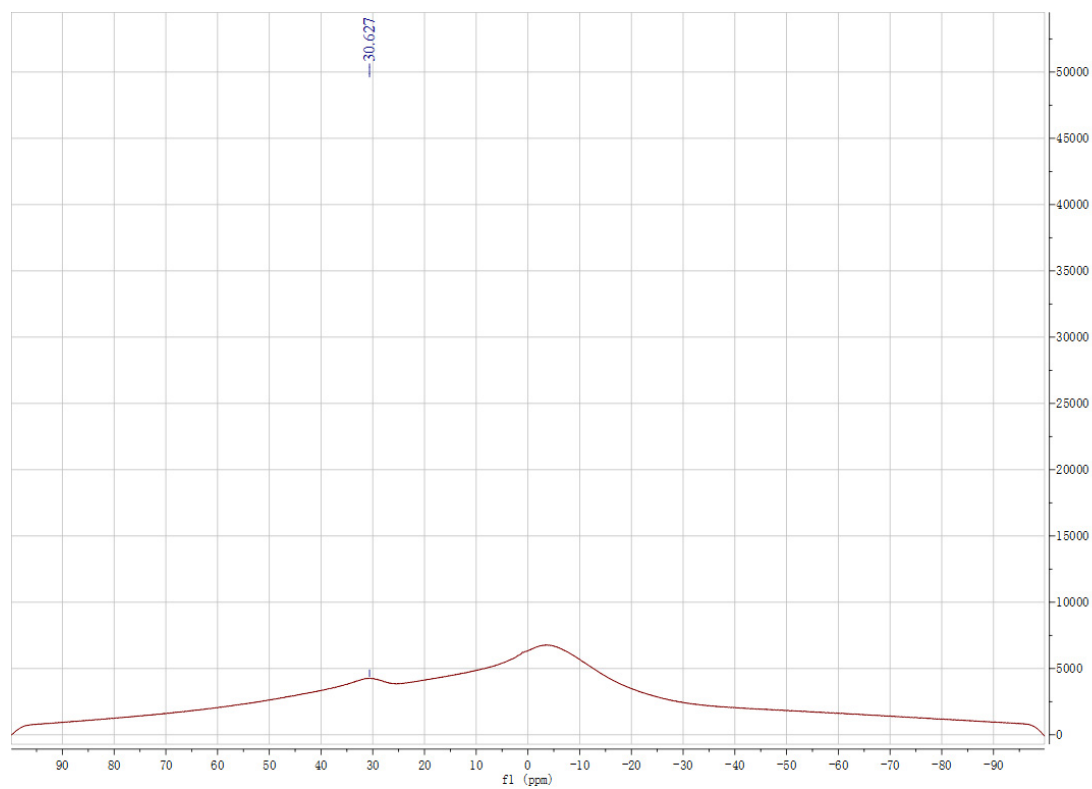

Fig. S12 <sup>11</sup>B NMR spectrum of 4.

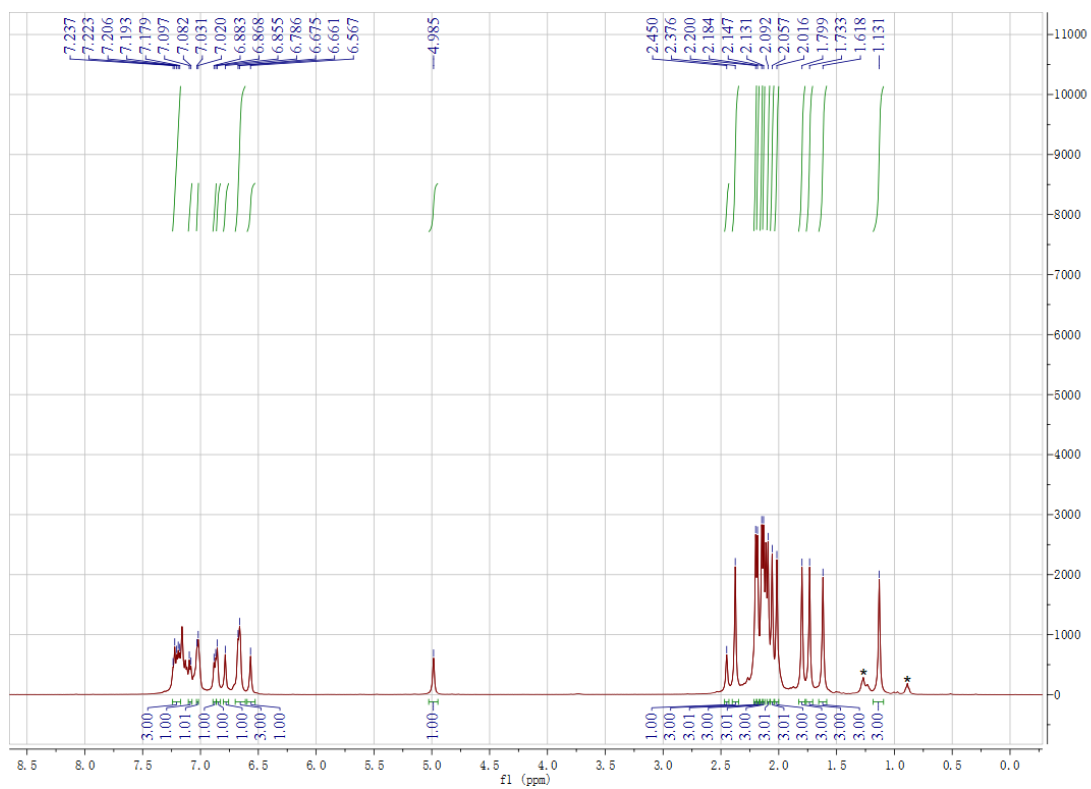

Fig. S13  $^1\text{H}$  NMR spectrum of **5**. (\*n-hexane)

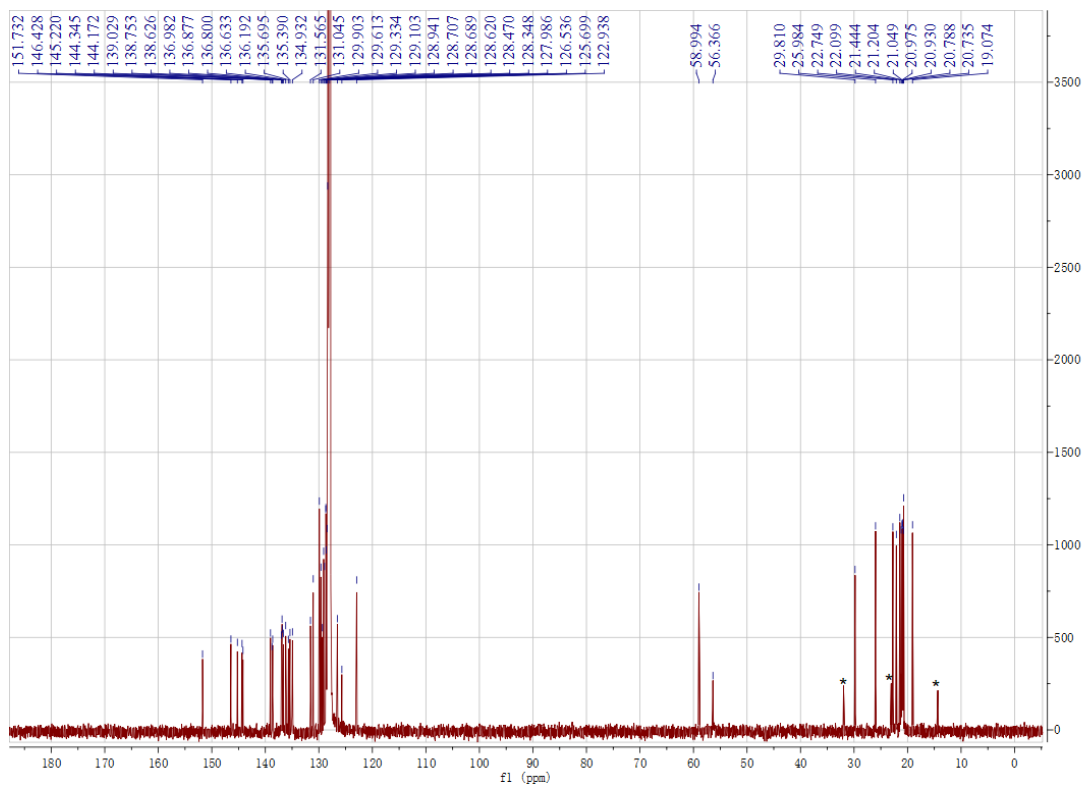

Fig. S14  $^{13}\text{C}$  NMR spectrum of **5**. (\*n-hexane)

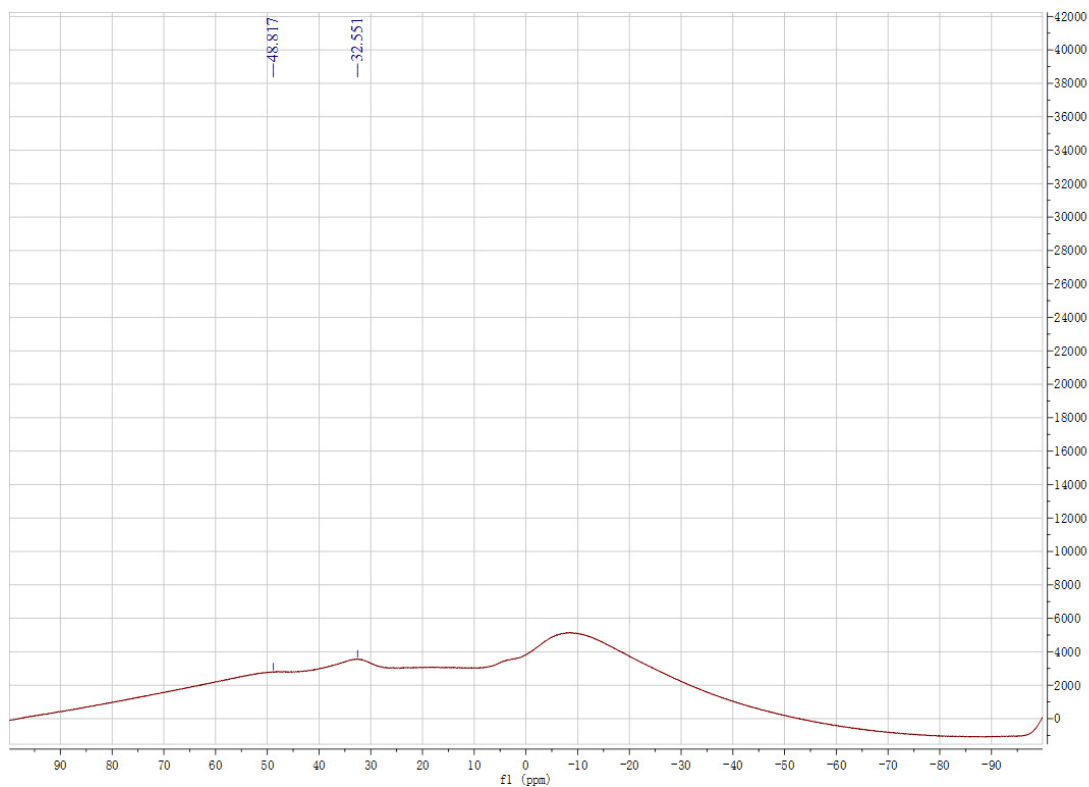

**Fig. S15**  $^{11}\text{B}$  NMR spectrum of **5**.

### Elemental Composition Report

#### Single Mass Analysis

Tolerance = 10.0 PPM / DBE: min = -5.0, max = 50.0  
 Element prediction: Off  
 Number of isotope peaks used for i-FIT = 3

Monoisotopic Mass, Even Electron Ions

66 formula(e) evaluated with 1 results within limits (up to 50 closest results for each mass)

Elements Used:

C: 49-59 H: 51-71 B: 1-6 N: 2-4 O: 2-2 Si: 0-4

C<sub>49</sub>H<sub>51</sub>B<sub>2</sub>N<sub>2</sub>O<sub>2</sub>

LW4A 15 (0.332)

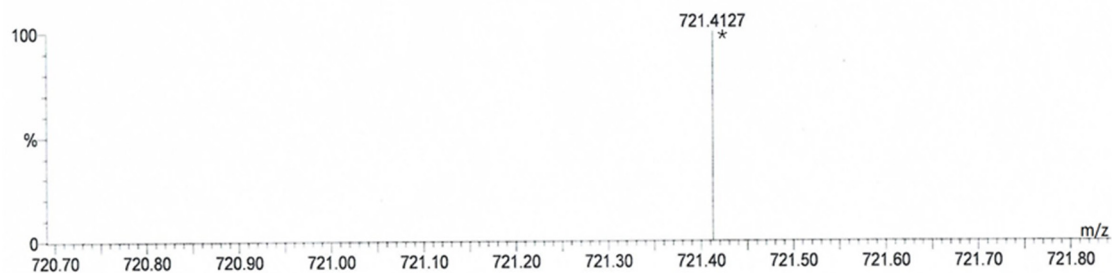

Minimum: -5.0  
 Maximum: 5.0 10.0 50.0

| Mass     | Calc. Mass | mDa  | PPM  | DBE  | i-FIT | i-FIT (Norm) | Formula                                                                      |
|----------|------------|------|------|------|-------|--------------|------------------------------------------------------------------------------|
| 721.4127 | 721.4137   | -1.0 | -1.4 | 26.5 | 9.8   | 0.0          | C <sub>49</sub> H <sub>51</sub> B <sub>2</sub> N <sub>2</sub> O <sub>2</sub> |

**Fig. S16** HRMS spectrum of **5**.

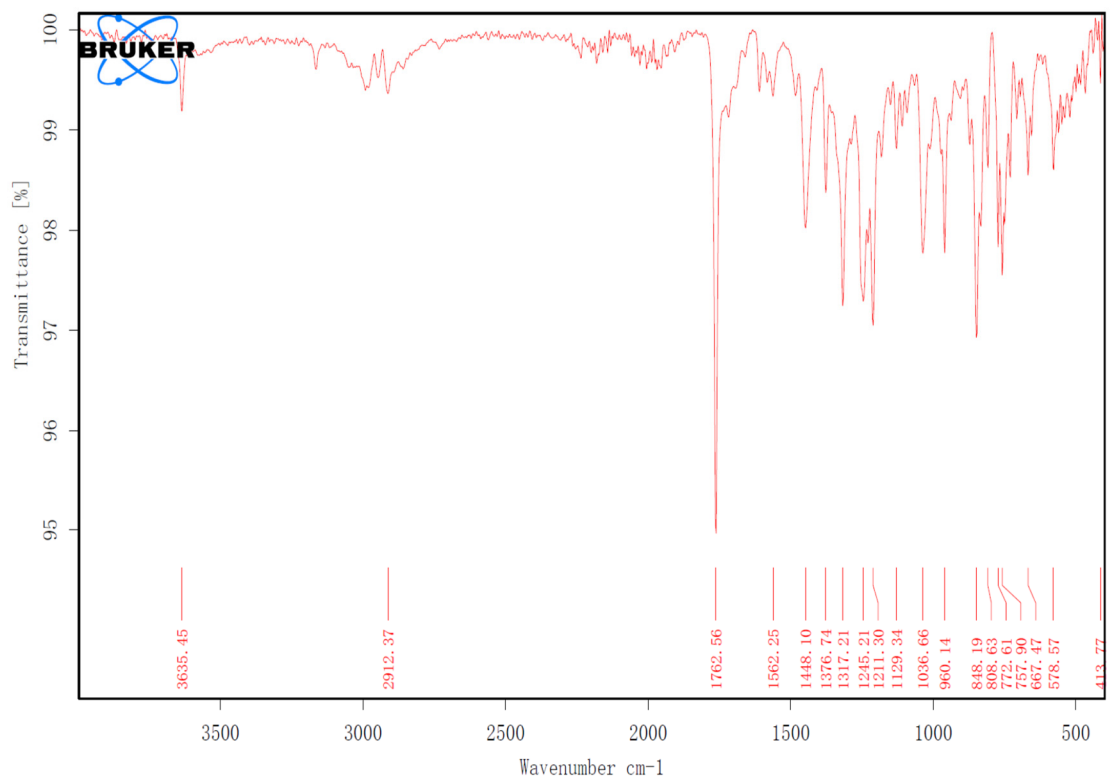

**Fig. S17** IR spectrum of **5**.

**Control experiments**

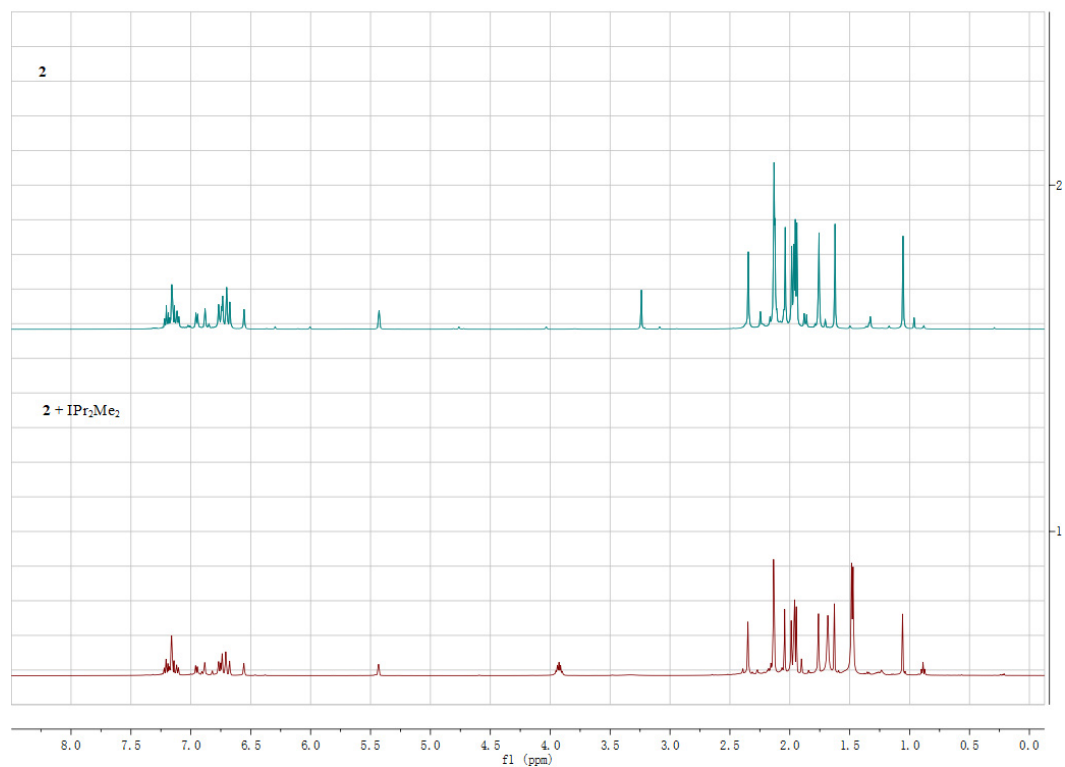

**Fig. S18** Control experiment between **2** and IPr<sub>2</sub>Me<sub>2</sub>.

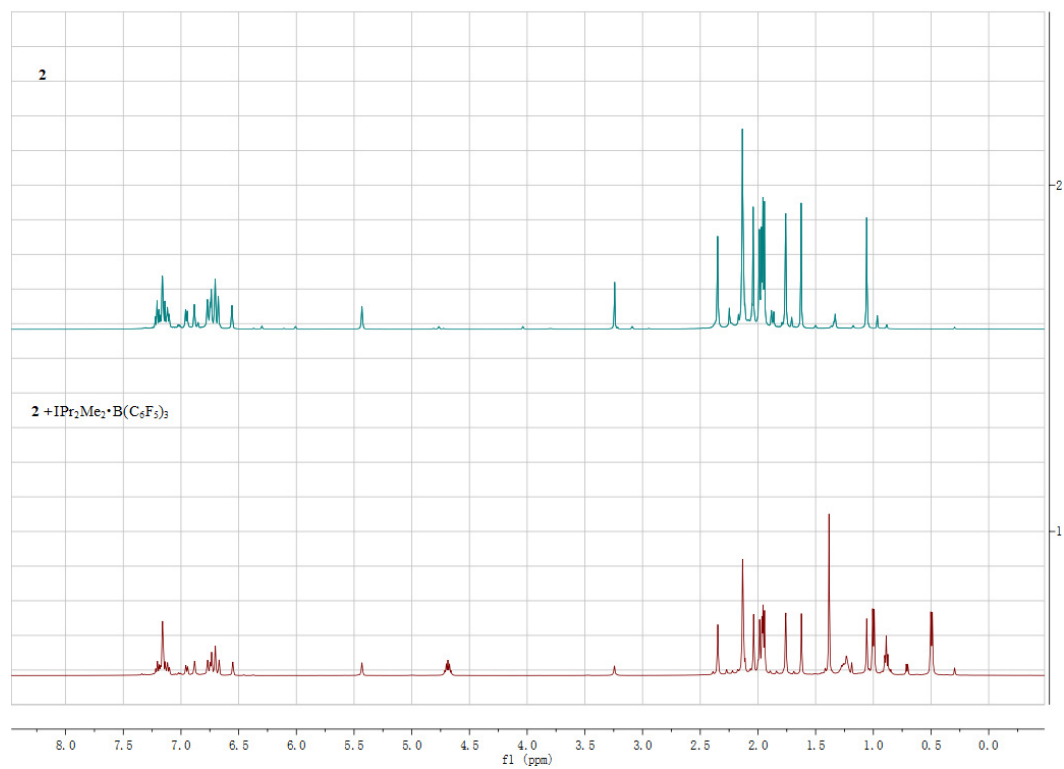

**Fig. S19** Control experiment between **2** and IPr<sub>2</sub>Me<sub>2</sub>·B(C<sub>6</sub>F<sub>5</sub>)<sub>3</sub>.

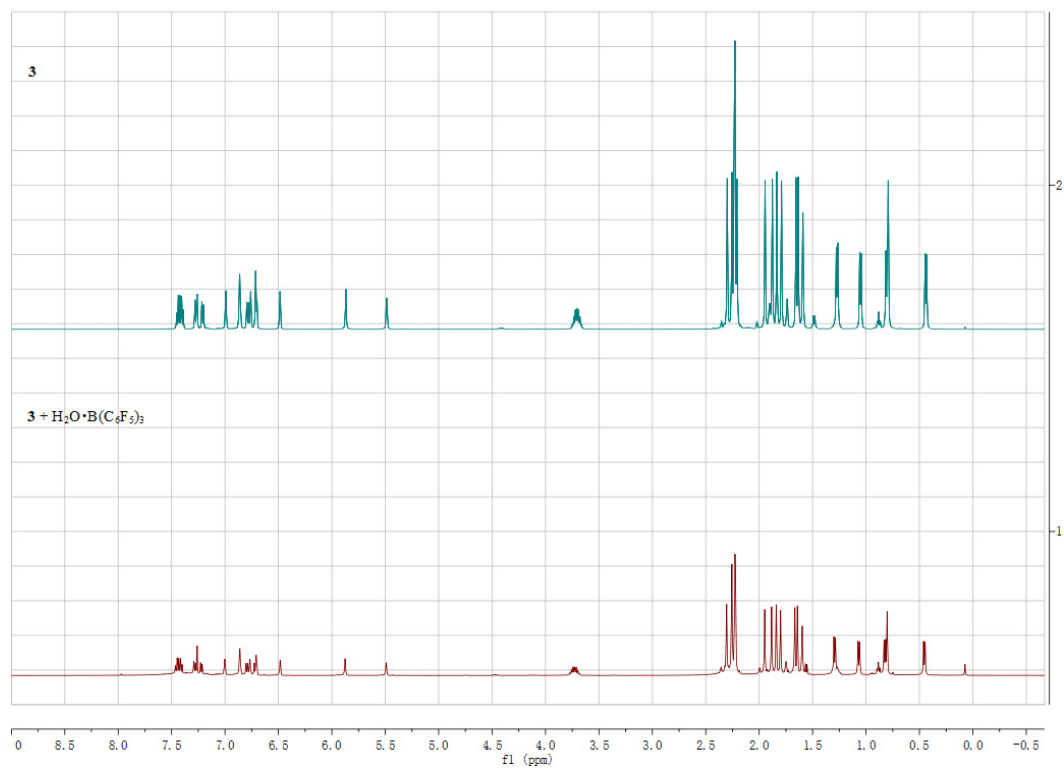

**Fig. S20** Control experiment between **3** and H<sub>2</sub>O·B(C<sub>6</sub>F<sub>5</sub>)<sub>3</sub>.

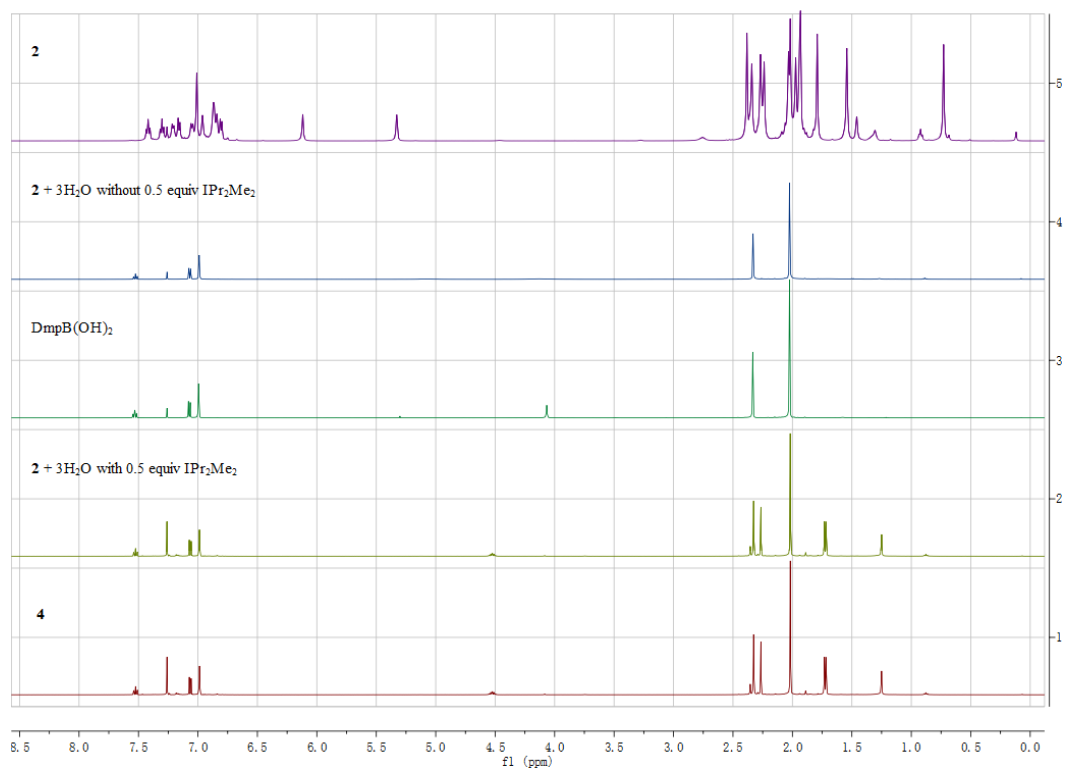

**Fig. S21** Control experiments between **2** with 3 equiv of H<sub>2</sub>O with or without IPr<sub>2</sub>Me<sub>2</sub> (0.5 equiv).

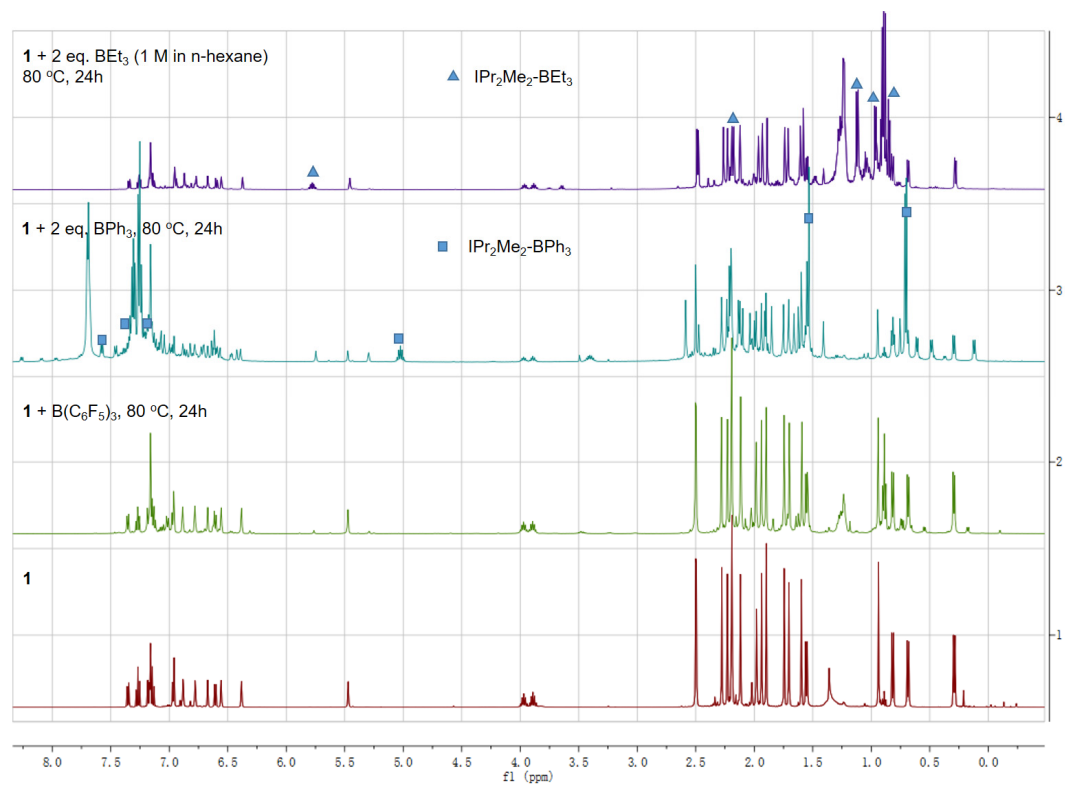

**Fig. S22** Control experiments between **1** and Lewis acids.



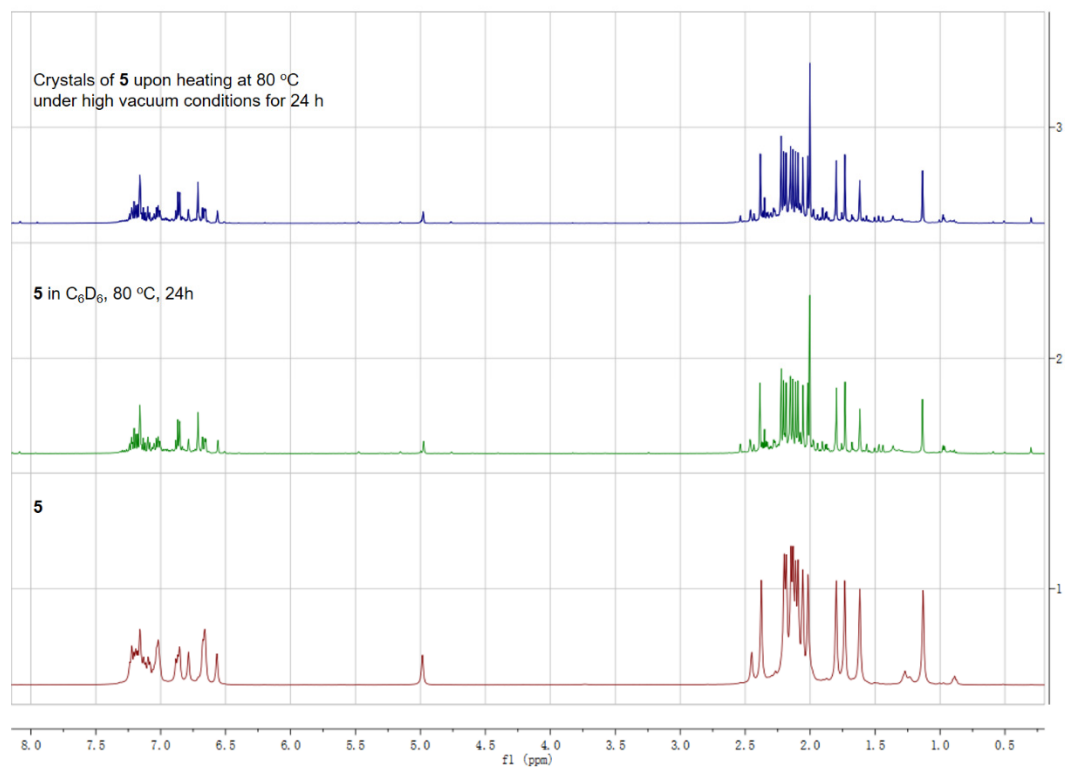

**Fig. S23** Thermal stability of **5**.

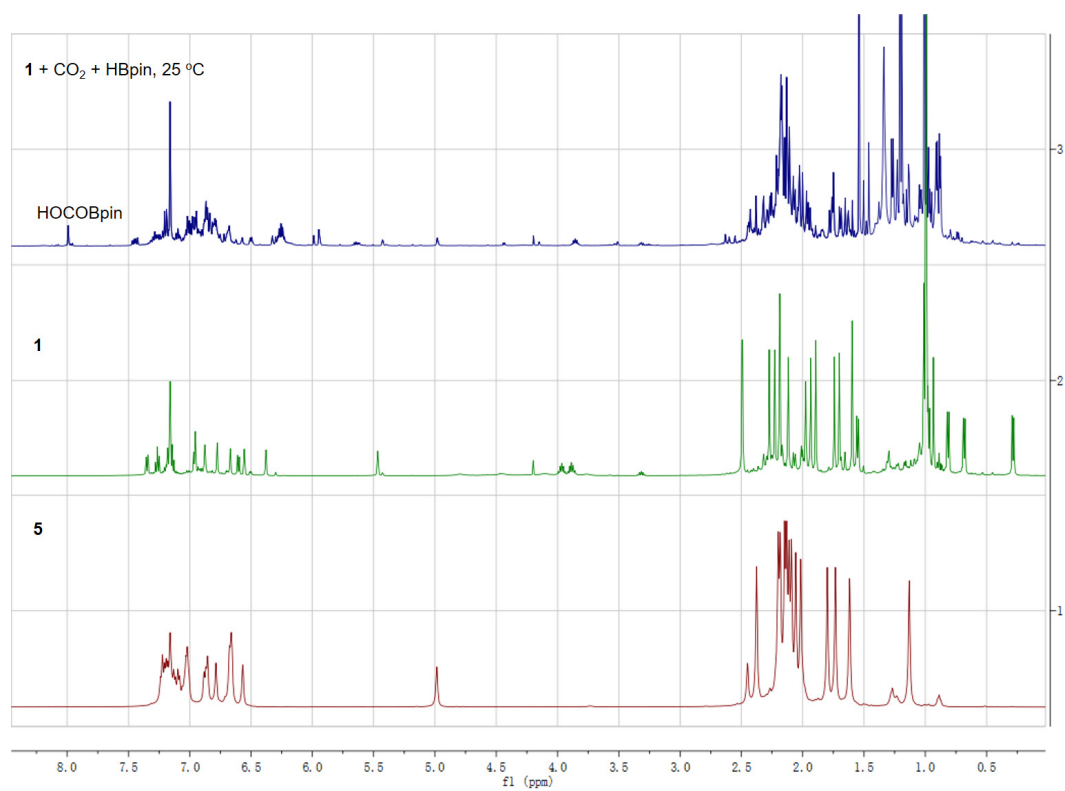

**Fig. S24** Control experiment of **1** with CO<sub>2</sub> in the presence of HBpin.

## Crystallographic details

All crystallographic intensity data was collected using a Rigaku Oxford Diffraction XtaLAB Synergy-S diffractometer equipped with a HyPix-6000HE Hybrid Photon Counting (HPC) detector, and PhotonJet-S microfocus sealed tube X-ray sources for generating Cu K $\alpha$  radiation ( $\lambda = 1.54184 \text{ \AA}$ ). A suitable single crystal identified by microscopy was mounted on a Nylon loop with paratone oil, and then quickly placed onto the instrument. The crystal temperature was held at 173 K using an Oxford Cryosystems CryostreamPlus 800 open-flow N<sub>2</sub> cryostat. Reflections were recorded, indexed and corrected for absorption with the *CrysAlis<sup>pro</sup>* software suit.<sup>S3</sup> All structures were solved by intrinsic phasing (ShelXT-2015),<sup>S4,S5</sup> and refined to convergence by full-matrix least squares methods based on  $F^2$  (SHELX-2018)<sup>S6</sup> embedded in the Olex2.<sup>S7</sup> All non-hydrogen atoms were refined with anisotropic displacement parameters (ADPs). Hydrogen atoms attached to carbon (CH) were placed in calculated positions and refined within a riding model, with  $U_{\text{iso}}(\text{H}) = 1.2 U_{\text{eq}}(\text{C})$  of the carrier atom ( $U_{\text{iso}}(\text{H}) = 1.5 U_{\text{eq}}(\text{C})$  for methyl groups). Hydrogen atoms bonded to nitrogen (NH) were located in geometrically idealized positions and then fixed with  $d(\text{N-H}) = 0.90 \text{ \AA}$  and  $U_{\text{iso}}(\text{H}) = 1.2 U_{\text{eq}}(\text{N})$ . Hydrogen atom bonded to oxygen (OH) was located and then fixed with  $U_{\text{iso}}(\text{H}) = 1.5 U_{\text{eq}}(\text{O})$ . The threshold  $(I_{\text{obs}} - I_{\text{calc}}) / \sigma(W) > 10$  was chosen for omitting these reflections.

**Table S1.** X-ray data for compounds **2**, **3** and **5**.

| Compounds                             | <b>2•toluene</b>                                                | <b>3</b>                                                                        | <b>5•(0.5benzene)</b>                                                        |
|---------------------------------------|-----------------------------------------------------------------|---------------------------------------------------------------------------------|------------------------------------------------------------------------------|
| Formula                               | C <sub>55</sub> H <sub>60</sub> B <sub>2</sub> N <sub>2</sub> O | C <sub>77</sub> H <sub>72</sub> B <sub>3</sub> F <sub>15</sub> N <sub>4</sub> O | C <sub>52</sub> H <sub>53</sub> B <sub>2</sub> N <sub>2</sub> O <sub>2</sub> |
| Formula weight                        | 786.67                                                          | 1386.81                                                                         | 759.58                                                                       |
| Temperature (K)                       | 172.99(10)                                                      | 173.00(10)                                                                      | 172.99(10)                                                                   |
| Wavelength (Å)                        | 1.54184                                                         | 1.54184                                                                         | 1.54184                                                                      |
| Crystal system                        | triclinic                                                       | triclinic                                                                       | triclinic                                                                    |
| Space group                           | P-1                                                             | P-1                                                                             | P-1                                                                          |
| a (Å)                                 | 11.6024(4)                                                      | 11.1752(4)                                                                      | 8.1757(3)                                                                    |
| b (Å)                                 | 12.4641(4)                                                      | 14.7860(5)                                                                      | 13.4922(6)                                                                   |
| c (Å)                                 | 17.0448(5)                                                      | 21.3743(7)                                                                      | 19.8843(8)                                                                   |
| $\alpha$ (°)                          | 111.154(3)                                                      | 81.940(3)                                                                       | 86.111(4)                                                                    |
| $\beta$ (°)                           | 91.945(3)                                                       | 77.947(3)                                                                       | 83.103(3)                                                                    |
| $\gamma$ (°)                          | 97.305(3)                                                       | 88.914(3)                                                                       | 72.919(4)                                                                    |
| V (°)                                 | 2271.64(13)                                                     | 3419.6(2)                                                                       | 2080.25(15)                                                                  |
| Z                                     | 2                                                               | 2                                                                               | 2                                                                            |
| Density (calcd. g/cm <sup>-3</sup> )  | 1.150                                                           | 1.347                                                                           | 1.213                                                                        |
| Absorption coeff. (mm <sup>-1</sup> ) | 0.509                                                           | 0.910                                                                           | 0.552                                                                        |
| Reflections collected                 | 22282                                                           | 33871                                                                           | 19731                                                                        |
| Independent reflections               | 7966                                                            | 12111                                                                           | 7330                                                                         |
|                                       | [R <sub>int</sub> = 0.0485]                                     | [R <sub>int</sub> = 0.0359]                                                     | [R <sub>int</sub> = 0.0876]                                                  |
| Data/restraints/parameters            | 7966/1/555                                                      | 12111/1/923                                                                     | 7330/0/535                                                                   |
| R <sub>1</sub> [I > 2 $\sigma$ (I)]   | 0.0618                                                          | 0.0420                                                                          | 0.0743                                                                       |
| wR <sub>2</sub> [all data]            | 0.1601                                                          | 0.1230                                                                          | 0.2211                                                                       |
| GOF                                   | 1.074                                                           | 1.075                                                                           | 1.040                                                                        |
| CCDC No                               | 2041862                                                         | 2041863                                                                         | 2041864                                                                      |

## Computational details

DFT calculations were carried out employing Gaussian 09 program package.<sup>S8</sup> Geometry optimizations and frequency calculations were calculated at M06-2X<sup>S9</sup> functional level combined with the def2-SVP basis set. Full optimization was applied in the reactants, intermediates, transition states, and the corresponding products of the research system. At the same level, the harmonic vibrational frequency calculations were implemented for all optimized geometries to verify the character of stationary points. Additionally, the solvent effects were taken into account in toluene using the SMD<sup>S10</sup> model (PhMe solvent,  $\epsilon = 2.3741$ ). NBO analysis was carried out using NBO 3.1 in Gaussian 09 package. All values in the square brackets of figures are the optimized bond distances in solution unless indicated. To refine the energetic accuracy of all the species, we recalculated the single point energies based on the optimized structures with M06-2X/def2-TZVP/SMD level of theory. In order to correct the overestimated entropies,<sup>S11,S12</sup> we used an empirical approach to correct the entropies: we estimated the total entropy in solution at 50%.<sup>S13-S15</sup>

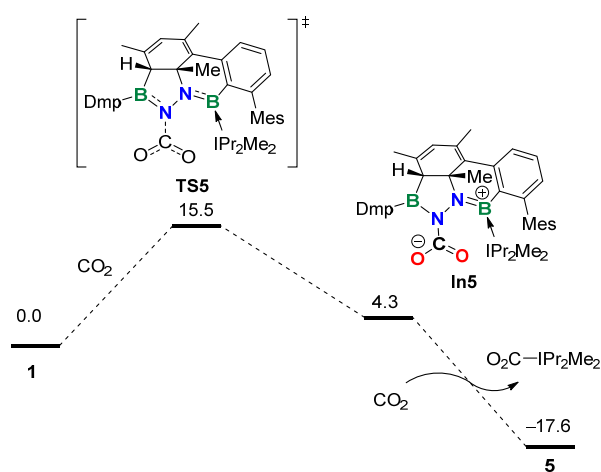

Fig. S25 Proposed reaction pathway for the generation of 5.

**Table S2.** Calculated geometries (atom, x-, y-, z-positions in Å).

1

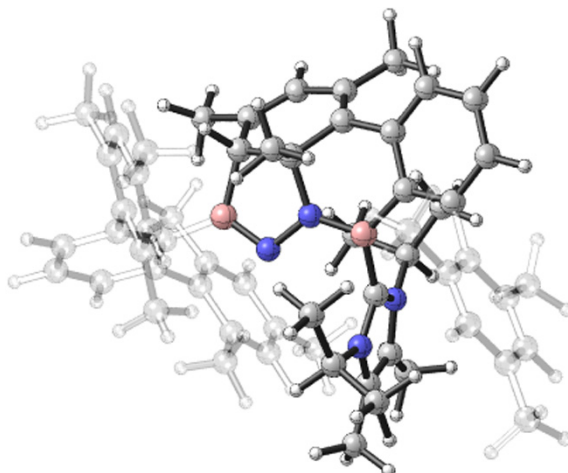

|   |            |            |            |
|---|------------|------------|------------|
| C | -1.8675590 | -1.4405860 | 1.5317680  |
| C | -0.3287740 | -1.5669180 | 1.5481400  |
| C | 0.3799470  | -1.2841670 | 2.8591960  |
| C | -0.2890180 | -0.7870120 | 3.9278580  |
| C | -1.7365330 | -0.5616140 | 3.8506320  |
| C | -2.4744690 | -0.8300720 | 2.7564790  |
| H | -2.2195000 | -0.1238020 | 4.7294210  |
| N | -0.8559550 | -0.0473120 | -0.2366700 |
| N | 0.1338980  | -0.4802120 | 0.6276800  |
| C | 1.8617330  | -1.3436060 | 2.7518140  |
| C | 2.6415890  | -1.9758860 | 3.7217910  |
| C | 2.4654160  | -0.7349380 | 1.6090630  |
| C | 4.0289400  | -2.0131270 | 3.5959200  |
| H | 2.1520120  | -2.4564480 | 4.5710510  |
| C | 3.8657120  | -0.8316230 | 1.4697420  |
| C | 4.6281650  | -1.4543450 | 2.4739490  |
| H | 4.6386810  | -2.5037740 | 4.3569220  |
| H | 5.7112760  | -1.5213980 | 2.3455980  |
| B | 1.4390130  | -0.0254910 | 0.6327170  |
| H | -2.3239500 | -2.4391940 | 1.4093780  |
| C | 1.2099230  | 3.4924980  | -0.6756920 |
| C | 1.4207440  | 2.8460740  | -1.8593740 |
| C | 0.8968840  | 2.8700210  | 1.7146020  |
| H | 1.1153390  | 3.9428870  | 1.7948730  |
| C | 1.8630660  | 0.4944920  | -2.6045360 |
| H | 1.0783530  | 0.6985690  | -3.3496650 |
| N | 1.3087690  | 2.5392550  | 0.3249360  |
| N | 1.6455140  | 1.5108880  | -1.5485870 |

|   |            |            |            |
|---|------------|------------|------------|
| C | 1.5701250  | 1.3295880  | -0.2170030 |
| C | 4.6519140  | -0.4418910 | 0.2467980  |
| C | 4.9761010  | -1.4677330 | -0.6709030 |
| C | 5.2340610  | 0.8297050  | 0.0933820  |
| C | 5.8546480  | -1.1984530 | -1.7219330 |
| C | 6.1179600  | 1.0571330  | -0.9700800 |
| C | 6.4439350  | 0.0588960  | -1.8869760 |
| H | 6.0959850  | -1.9991260 | -2.4269520 |
| H | 6.5716030  | 2.0467240  | -1.0740750 |
| B | -2.0701940 | -0.5788610 | 0.1437930  |
| C | -3.4171420 | -0.4952500 | -0.7196100 |
| C | -4.1803770 | 0.6762280  | -0.9368190 |
| C | -3.8924160 | -1.6943920 | -1.3108380 |
| C | -5.4049070 | 0.6120410  | -1.6208470 |
| C | -5.1148420 | -1.7384920 | -1.9891410 |
| C | -5.8885750 | -0.5894360 | -2.1254400 |
| H | -5.9763630 | 1.5325780  | -1.7651490 |
| H | -5.4466090 | -2.6812980 | -2.4319580 |
| H | -6.8447910 | -0.6234130 | -2.6509350 |
| C | 0.0697280  | -2.9198250 | 0.9477670  |
| H | 1.1580800  | -3.0020430 | 0.8145370  |
| H | -0.2638710 | -3.7386890 | 1.6027870  |
| H | -0.4171010 | -3.0373250 | -0.0317730 |
| C | 0.3612590  | -0.3384670 | 5.2109540  |
| H | -0.0623710 | 0.6292810  | 5.5224750  |
| H | 0.1505940  | -1.0496430 | 6.0269640  |
| H | 1.4492300  | -0.2271450 | 5.1300860  |
| C | -3.9385330 | -0.5253990 | 2.7002830  |
| H | -4.1196120 | 0.2465000  | 1.9385640  |
| H | -4.5206070 | -1.4083590 | 2.3909990  |
| H | -4.3256660 | -0.1689680 | 3.6650180  |
| C | 4.4282890  | -2.8623170 | -0.4999700 |
| H | 4.5694410  | -3.4515390 | -1.4161460 |
| H | 4.9393820  | -3.3849740 | 0.3238600  |
| H | 3.3584850  | -2.8571650 | -0.2464890 |
| C | 7.3672170  | 0.3268480  | -3.0454240 |
| H | 8.0996370  | -0.4836760 | -3.1699650 |
| H | 6.7999780  | 0.3998650  | -3.9873940 |
| H | 7.9158170  | 1.2689400  | -2.9122750 |
| C | 4.9437310  | 1.9462910  | 1.0603680  |
| H | 3.9728460  | 2.4163690  | 0.8355460  |
| H | 4.9025880  | 1.5795360  | 2.0958250  |
| H | 5.7131990  | 2.7275880  | 0.9981090  |
| C | 1.4119230  | 3.4093300  | -3.2417560 |

|   |            |            |            |
|---|------------|------------|------------|
| H | 0.9827190  | 2.7053570  | -3.9669530 |
| H | 0.7983630  | 4.3193000  | -3.2631640 |
| H | 2.4203540  | 3.6808840  | -3.5882670 |
| C | 0.9374660  | 4.9338280  | -0.4125320 |
| H | 0.8404420  | 5.4737810  | -1.3624580 |
| H | 0.0048530  | 5.0698540  | 0.1537700  |
| H | 1.7561780  | 5.4037370  | 0.1538730  |
| C | -3.7253750 | 2.0538030  | -0.5466560 |
| C | -4.3924850 | 2.7893180  | 0.4531560  |
| C | -2.7233350 | 2.6867200  | -1.3188490 |
| C | -4.0063120 | 4.1117640  | 0.7083350  |
| C | -2.3980180 | 4.0196590  | -1.0561770 |
| C | -3.0173590 | 4.7497220  | -0.0368290 |
| H | -4.5251300 | 4.6656490  | 1.4970080  |
| H | -1.6428910 | 4.5068660  | -1.6804160 |
| C | -3.0430370 | -2.9310510 | -1.3355540 |
| C | -1.9903640 | -3.0072250 | -2.2735810 |
| C | -3.3098780 | -4.0260430 | -0.4969470 |
| C | -1.2049750 | -4.1604890 | -2.3237390 |
| C | -2.4899410 | -5.1594220 | -0.5672340 |
| C | -1.4293980 | -5.2443430 | -1.4684540 |
| H | -0.3869820 | -4.2126530 | -3.0485790 |
| H | -2.6907680 | -5.9980220 | 0.1053400  |
| C | -4.4702310 | -3.9981080 | 0.4629810  |
| H | -5.4246250 | -4.1547470 | -0.0643230 |
| H | -4.3734220 | -4.7855290 | 1.2230240  |
| H | -4.5490470 | -3.0278350 | 0.9722480  |
| C | -0.5272980 | -6.4496720 | -1.5119100 |
| H | -0.9072990 | -7.2588590 | -0.8740870 |
| H | -0.4278480 | -6.8387350 | -2.5362210 |
| H | 0.4843690  | -6.1915420 | -1.1612890 |
| C | -1.7214760 | -1.8639340 | -3.2168030 |
| H | -0.9145210 | -2.1175690 | -3.9178640 |
| H | -2.6211090 | -1.6112430 | -3.7989630 |
| H | -1.4356310 | -0.9612710 | -2.6545870 |
| C | -5.5649320 | 2.2433550  | 1.2336290  |
| H | -5.7686650 | 1.1893760  | 1.0154050  |
| H | -5.3965540 | 2.3473810  | 2.3159250  |
| H | -6.4759430 | 2.8140010  | 0.9928170  |
| C | -2.6220520 | 6.1724620  | 0.2630290  |
| H | -2.0338670 | 6.6082060  | -0.5565920 |
| H | -3.5049600 | 6.8080790  | 0.4239600  |
| H | -2.0152960 | 6.2299860  | 1.1818410  |
| C | -2.0230030 | 1.9650390  | -2.4399770 |

|   |            |            |            |
|---|------------|------------|------------|
| H | -1.4629430 | 2.6781360  | -3.0627240 |
| H | -1.3232720 | 1.2255660  | -2.0140720 |
| H | -2.7368910 | 1.4266400  | -3.0815530 |
| C | 1.6784250  | -0.9343930 | -2.1247400 |
| H | 2.4429920  | -1.2026710 | -1.3833410 |
| H | 0.6761100  | -1.0913140 | -1.7059490 |
| H | 1.8126360  | -1.5988030 | -2.9899630 |
| C | 3.2397510  | 0.6974260  | -3.2241250 |
| H | 3.4049850  | -0.0461610 | -4.0167870 |
| H | 3.3610840  | 1.6958980  | -3.6646210 |
| H | 4.0092720  | 0.5606740  | -2.4537150 |
| C | 1.6840580  | 2.1677560  | 2.8099270  |
| H | 1.3216270  | 1.1468760  | 2.9703770  |
| H | 2.7609410  | 2.1404580  | 2.6070550  |
| H | 1.5264910  | 2.7237840  | 3.7452560  |
| C | -0.6037300 | 2.6520940  | 1.8775130  |
| H | -1.1785430 | 3.1915430  | 1.1118000  |
| H | -0.8484490 | 1.5833810  | 1.7902130  |
| H | -0.9187090 | 3.0029530  | 2.8714900  |

[1-H]<sup>+</sup>

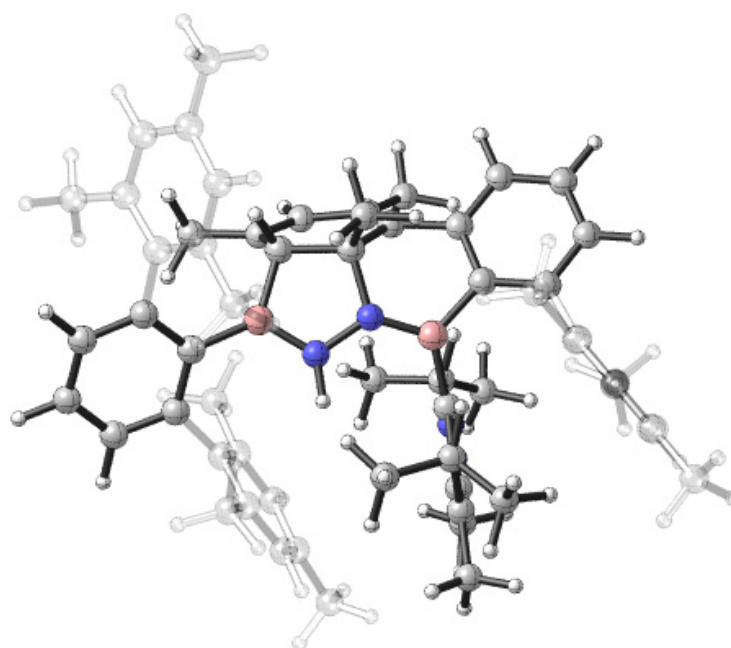

|   |            |            |            |
|---|------------|------------|------------|
| N | -0.9043630 | 0.3804480  | -0.1542910 |
| N | -0.1170710 | -0.7101620 | 0.1993560  |
| N | 2.5888500  | 1.2395490  | -0.8216950 |
| N | 2.4714730  | 1.1537130  | 1.3422440  |



|   |            |            |            |
|---|------------|------------|------------|
| C | -3.3971150 | 1.1927490  | -0.5013370 |
| C | -4.6179180 | 0.7054600  | -1.0427190 |
| C | -5.6211560 | 1.5925360  | -1.4447000 |
| C | -5.4531170 | 2.9673290  | -1.3172690 |
| C | -4.2478630 | 3.4615350  | -0.8339610 |
| C | -3.2145270 | 2.5944170  | -0.4545540 |
| C | -4.8577190 | -0.7547440 | -1.2592000 |
| C | -4.0634890 | -1.4600450 | -2.1907610 |
| C | -4.2505110 | -2.8339890 | -2.3423850 |
| C | -5.2070340 | -3.5365990 | -1.6016320 |
| C | -6.0187860 | -2.8112670 | -0.7305920 |
| C | -5.8822660 | -1.4266750 | -0.5649320 |
| C | -3.0352150 | -0.7575020 | -3.0448880 |
| C | -5.3700360 | -5.0223400 | -1.7785400 |
| C | -6.8726190 | -0.7068880 | 0.3178430  |
| C | -1.9223360 | 3.2572320  | -0.0842810 |
| C | -1.5685310 | 3.4842840  | 1.2562680  |
| C | -0.4406660 | 4.2654610  | 1.5366080  |
| C | 0.3548270  | 4.8041370  | 0.5238890  |
| C | 0.0210050  | 4.5102100  | -0.8026710 |
| C | -1.1161710 | 3.7639790  | -1.1258290 |
| C | -2.3960220 | 2.9093690  | 2.3741240  |
| C | 1.4937000  | 5.7381240  | 0.8336230  |
| C | -1.4998720 | 3.5603140  | -2.5702670 |
| C | 1.8408000  | -2.2041990 | 0.7602850  |
| C | 3.1115570  | -2.7202810 | 0.4503950  |
| C | 3.5359140  | -3.9195290 | 1.0427230  |
| C | 2.7130650  | -4.6130730 | 1.9243230  |
| C | 1.4421100  | -4.1247580 | 2.2211970  |
| C | 1.0022130  | -2.9293810 | 1.6482780  |
| C | -0.3418440 | -2.3598810 | 1.9071940  |
| C | -0.8350590 | -2.0980010 | 3.1391360  |
| C | -2.1134890 | -1.3952870 | 3.2907330  |
| C | -2.8643970 | -0.9786480 | 2.2562510  |
| C | -2.4174820 | -1.1932140 | 0.8322600  |
| C | -1.0162130 | -1.8326410 | 0.6485370  |
| C | -1.0876000 | -2.8818600 | -0.4647450 |
| C | -0.1376670 | -2.4471840 | 4.4265680  |
| C | -4.2242160 | -0.3875350 | 2.4686220  |
| C | 4.0422900  | -2.1164210 | -0.5569900 |
| C | 3.8657690  | -2.4310360 | -1.9213210 |
| C | 4.8597560  | -2.0725010 | -2.8327680 |
| C | 6.0151940  | -1.3903960 | -2.4351130 |
| C | 6.1437180  | -1.0418540 | -1.0901130 |

|   |            |            |            |
|---|------------|------------|------------|
| C | 5.1788010  | -1.4023720 | -0.1411690 |
| C | 2.6370720  | -3.1724410 | -2.3837260 |
| C | 5.3873120  | -1.0676240 | 1.3127790  |
| C | 7.0525710  | -0.9887100 | -3.4482080 |
| C | 2.1403850  | 0.5093780  | 0.2084950  |
| C | 3.1329850  | 2.3286000  | 1.0293160  |
| C | 3.2127810  | 2.3822480  | -0.3409940 |
| C | 2.0290930  | 0.6730570  | 2.6777460  |
| C | 3.0767880  | 0.8417130  | 3.7716760  |
| C | 0.6932280  | 1.3056430  | 3.0419200  |
| C | 2.4020420  | 0.8317090  | -2.2347670 |
| C | 1.2146950  | 1.5509550  | -2.8590090 |
| C | 3.6665200  | 1.0126620  | -3.0652270 |
| C | 3.6162840  | 3.3187600  | 2.0338510  |
| C | 3.8308380  | 3.4402050  | -1.1908570 |
| B | -2.2880670 | 0.1963560  | 0.0240920  |
| B | 1.2664910  | -0.8253960 | 0.2613770  |
| H | -3.1748820 | -1.8383750 | 0.3588890  |
| H | -0.4069060 | 1.1812700  | -0.5342710 |
| H | -6.5430330 | 1.1904150  | -1.8692940 |
| H | -6.2491220 | 3.6503490  | -1.6182620 |
| H | -4.0843800 | 4.5394490  | -0.7664090 |
| H | -3.6339870 | -3.3760070 | -3.0654010 |
| H | -6.7973790 | -3.3338550 | -0.1680590 |
| H | -3.4314950 | 0.1844010  | -3.4518930 |
| H | -2.7364320 | -1.3979510 | -3.8857850 |
| H | -2.1216860 | -0.5044260 | -2.4823720 |
| H | -5.7160020 | -5.2608700 | -2.7958070 |
| H | -6.0988880 | -5.4338210 | -1.0680560 |
| H | -4.4138780 | -5.5460130 | -1.6308320 |
| H | -6.4546630 | 0.1939410  | 0.7829640  |
| H | -7.2435840 | -1.3724730 | 1.1098840  |
| H | -7.7492510 | -0.3922910 | -0.2711820 |
| H | -0.2001550 | 4.4850250  | 2.5807300  |
| H | 0.6298960  | 4.9261830  | -1.6115920 |
| H | -3.4610700 | 3.1589040  | 2.2551670  |
| H | -2.0584260 | 3.2827440  | 3.3503700  |
| H | -2.3224650 | 1.8083250  | 2.3928450  |
| H | 1.2110800  | 6.7753220  | 0.5936480  |
| H | 2.3837680  | 5.5023560  | 0.2329710  |
| H | 1.7677390  | 5.7102100  | 1.8965140  |
| H | -1.7634790 | 2.5129870  | -2.7817300 |
| H | -0.6844410 | 3.8608310  | -3.2413790 |
| H | -2.3855980 | 4.1602640  | -2.8293550 |

|   |            |            |            |
|---|------------|------------|------------|
| H | 4.5200800  | -4.3172450 | 0.7858790  |
| H | 3.0561140  | -5.5507390 | 2.3653070  |
| H | 0.7774000  | -4.6837120 | 2.8822870  |
| H | -2.4823120 | -1.2456080 | 4.3094770  |
| H | -1.4948170 | -2.4247110 | -1.3787080 |
| H | -1.7609530 | -3.6963920 | -0.1611320 |
| H | -0.1013420 | -3.3084490 | -0.6889600 |
| H | -0.6354240 | -3.2965930 | 4.9220950  |
| H | -0.2054870 | -1.6001470 | 5.1267060  |
| H | 0.9193660  | -2.7044360 | 4.2914630  |
| H | -4.3602840 | 0.5536270  | 1.9137760  |
| H | -4.4160170 | -0.2017700 | 3.5339120  |
| H | -4.9881910 | -1.0899840 | 2.0988660  |
| H | 4.7340870  | -2.3396900 | -3.8858790 |
| H | 7.0311560  | -0.4934910 | -0.7611410 |
| H | 2.5364850  | -4.1401390 | -1.8688140 |
| H | 2.6720560  | -3.3597560 | -3.4649540 |
| H | 1.7178460  | -2.6044440 | -2.1627050 |
| H | 4.4284240  | -0.9424950 | 1.8334380  |
| H | 5.9775080  | -0.1466370 | 1.4242000  |
| H | 5.9300370  | -1.8738760 | 1.8320150  |
| H | 7.2007470  | -1.7753500 | -4.2012550 |
| H | 8.0201740  | -0.7800030 | -2.9724810 |
| H | 6.7417170  | -0.0780360 | -3.9868090 |
| H | 1.8779380  | -0.4059410 | 2.5374680  |
| H | 4.0819050  | 0.5610610  | 3.4297100  |
| H | 2.8081070  | 0.1726830  | 4.6010800  |
| H | 3.1053770  | 1.8621690  | 4.1722500  |
| H | 0.8050310  | 2.3882480  | 3.2021420  |
| H | 0.3110730  | 0.8566030  | 3.9701900  |
| H | -0.0496060 | 1.1449370  | 2.2463780  |
| H | 2.1862900  | -0.2456610 | -2.1714730 |
| H | 0.2673030  | 1.2947330  | -2.3674090 |
| H | 1.1276940  | 1.2579350  | -3.9149380 |
| H | 1.3507630  | 2.6415490  | -2.8175170 |
| H | 3.7705370  | 2.0441760  | -3.4262790 |
| H | 3.6006430  | 0.3600850  | -3.9463200 |
| H | 4.5618350  | 0.7243390  | -2.5001150 |
| H | 2.8156800  | 3.5891550  | 2.7369560  |
| H | 3.9405090  | 4.2313870  | 1.5218670  |
| H | 4.4693190  | 2.9363330  | 2.6113570  |
| H | 4.7613050  | 3.0957960  | -1.6616610 |
| H | 4.0813330  | 4.3080770  | -0.5696060 |
| H | 3.1486980  | 3.7767630  | -1.9842820 |

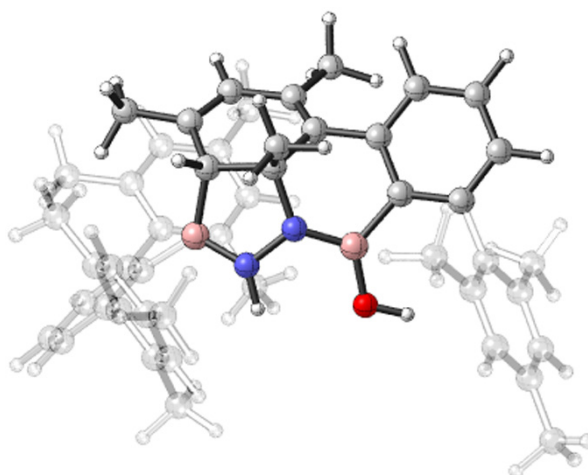

|   |            |            |            |
|---|------------|------------|------------|
| C | -1.4561710 | 0.2328610  | 1.4948570  |
| C | 0.0881400  | 0.4085150  | 1.6314840  |
| C | 0.5773980  | 1.8541040  | 1.6901600  |
| C | -0.2875850 | 2.8944320  | 1.7338230  |
| C | -1.7328480 | 2.6565990  | 1.8684750  |
| C | -2.2906480 | 1.4377940  | 1.7939880  |
| H | -2.3667940 | 3.5280850  | 2.0584380  |
| N | -0.3443920 | -0.7594870 | -0.3636520 |
| N | 0.6620250  | -0.1599780 | 0.3890310  |
| C | 2.0608850  | 1.9831110  | 1.6304310  |
| C | 2.7526860  | 2.8823350  | 2.4522260  |
| C | 2.7910220  | 1.1281820  | 0.7667280  |
| C | 4.1434940  | 2.9595680  | 2.4059340  |
| H | 2.1979470  | 3.5064660  | 3.1546290  |
| C | 4.1928930  | 1.2212850  | 0.7224820  |
| C | 4.8629910  | 2.1386760  | 1.5411750  |
| H | 4.6706150  | 3.6570640  | 3.0596700  |
| H | 5.9535230  | 2.1936610  | 1.5087080  |
| B | 1.9400540  | 0.1339130  | -0.1149210 |
| H | -1.7698800 | -0.5547560 | 2.2084940  |
| C | 4.9785360  | 0.3370580  | -0.1954660 |
| C | 5.1241040  | -1.0349200 | 0.0981680  |
| C | 5.5294830  | 0.8685410  | -1.3771510 |
| C | 5.8277680  | -1.8470760 | -0.7928280 |
| C | 6.2212950  | 0.0172730  | -2.2475360 |
| C | 6.3842730  | -1.3411900 | -1.9722590 |
| H | 5.9421950  | -2.9098490 | -0.5615620 |
| H | 6.6409870  | 0.4313750  | -3.1682140 |
| B | -1.6363290 | -0.4852390 | 0.0638320  |
| C | -2.8921500 | -0.9421020 | -0.7825830 |
| C | -3.6443180 | -0.0253980 | -1.5518560 |

|   |            |            |            |
|---|------------|------------|------------|
| C | -3.2174990 | -2.3149720 | -0.8472360 |
| C | -4.6738970 | -0.4939790 | -2.3781410 |
| C | -4.2627710 | -2.7577340 | -1.6638590 |
| C | -4.9830900 | -1.8497730 | -2.4371440 |
| H | -5.2357780 | 0.2199460  | -2.9842260 |
| H | -4.5037790 | -3.8229530 | -1.6951490 |
| H | -5.7876150 | -2.1991390 | -3.0867470 |
| C | 0.5909060  | -0.3969680 | 2.8343730  |
| H | 1.6836590  | -0.3319430 | 2.9394930  |
| H | 0.1273500  | -0.0207530 | 3.7594150  |
| H | 0.3136580  | -1.4550670 | 2.7023510  |
| C | 0.1028920  | 4.3457980  | 1.6393890  |
| H | -0.5812780 | 4.8498670  | 0.9390850  |
| H | -0.0086120 | 4.8549010  | 2.6111320  |
| H | 1.1289070  | 4.4961590  | 1.2845090  |
| C | -3.7432780 | 1.1883500  | 2.0561860  |
| H | -4.1756400 | 0.5349660  | 1.2834010  |
| H | -3.8660990 | 0.6658970  | 3.0207510  |
| H | -4.3191290 | 2.1230480  | 2.0936030  |
| C | 4.5129480  | -1.6293460 | 1.3407470  |
| H | 4.7025000  | -1.0008200 | 2.2225990  |
| H | 3.4186800  | -1.7250210 | 1.2426000  |
| H | 4.9169050  | -2.6323870 | 1.5312540  |
| C | 7.1410370  | -2.2463250 | -2.9076380 |
| H | 6.5393330  | -3.1250850 | -3.1831170 |
| H | 7.4241130  | -1.7224930 | -3.8302310 |
| H | 8.0621990  | -2.6189610 | -2.4338190 |
| C | 5.3564270  | 2.3256280  | -1.7235080 |
| H | 4.2964250  | 2.6196870  | -1.6887340 |
| H | 5.8865920  | 2.9755730  | -1.0118230 |
| H | 5.7427970  | 2.5357380  | -2.7295750 |
| H | -0.0086910 | -1.2178110 | -1.2037430 |
| O | 2.2850270  | -0.4157180 | -1.3263840 |
| H | 3.1954230  | -0.2284520 | -1.5837620 |
| C | -3.3858130 | 1.4490110  | -1.4654450 |
| C | -4.3909080 | 2.2940700  | -0.9315890 |
| C | -2.1707320 | 2.0128430  | -1.9009370 |
| C | -4.1253510 | 3.6530370  | -0.7727830 |
| C | -1.9481520 | 3.3853170  | -1.7195500 |
| C | -2.9034460 | 4.2208660  | -1.1495650 |
| H | -4.8995890 | 4.2951980  | -0.3420380 |
| H | -0.9956650 | 3.8075600  | -2.0536450 |
| C | -2.4318320 | -3.3030820 | -0.0405410 |
| C | -1.3740620 | -4.0120210 | -0.6339560 |

|   |            |            |            |
|---|------------|------------|------------|
| C | -2.7357420 | -3.4968810 | 1.3215540  |
| C | -0.6203610 | -4.8927860 | 0.1499960  |
| C | -1.9636250 | -4.3883190 | 2.0694760  |
| C | -0.8965780 | -5.0928780 | 1.5028490  |
| H | 0.2099350  | -5.4330790 | -0.3129340 |
| H | -2.2021570 | -4.5394090 | 3.1263360  |
| C | -1.1077610 | 1.2315620  | -2.6355950 |
| H | -1.4066190 | 0.1946120  | -2.8288780 |
| H | -0.9070920 | 1.7115000  | -3.6054860 |
| H | -0.1624660 | 1.2204070  | -2.0731020 |
| C | -5.7600570 | 1.7836480  | -0.5484530 |
| H | -6.4361370 | 1.7852560  | -1.4184960 |
| H | -5.7415770 | 0.7561290  | -0.1641410 |
| H | -6.2130790 | 2.4335280  | 0.2131340  |
| C | -2.6568530 | 5.6951540  | -0.9649820 |
| H | -1.6262650 | 5.9670260  | -1.2306070 |
| H | -3.3344070 | 6.2911310  | -1.5960210 |
| H | -2.8365500 | 6.0014330  | 0.0768970  |
| C | -1.0510460 | -3.8426610 | -2.0964980 |
| H | -1.7744580 | -4.3844420 | -2.7263510 |
| H | -1.1008250 | -2.7899730 | -2.4111620 |
| H | -0.0498640 | -4.2311010 | -2.3264980 |
| C | -3.8890660 | -2.7654570 | 1.9585410  |
| H | -3.7652210 | -1.6748070 | 1.8861890  |
| H | -4.8363620 | -3.0045460 | 1.4515780  |
| H | -3.9881300 | -3.0302170 | 3.0196680  |
| C | -0.0755830 | -6.0370290 | 2.3412680  |
| H | 0.4346490  | -5.5010410 | 3.1562040  |
| H | -0.7090110 | -6.8075460 | 2.8057380  |
| H | 0.6903910  | -6.5442550 | 1.7397810  |

4

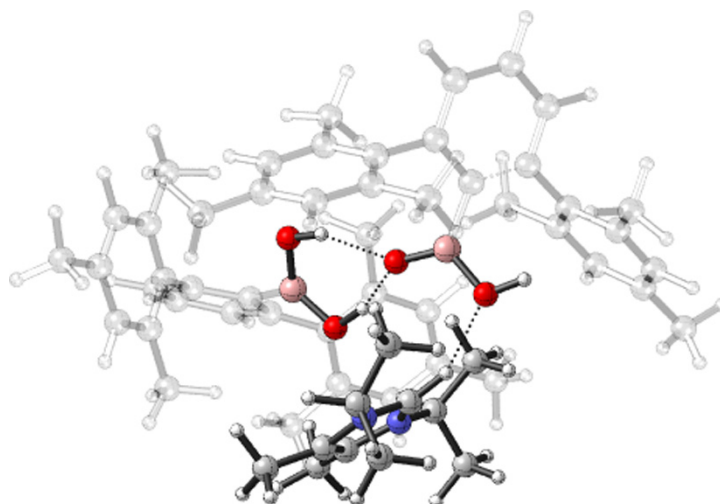

|   |            |            |            |
|---|------------|------------|------------|
| C | 2.5852660  | 2.8999240  | -1.7246360 |
| C | 2.8638920  | 1.5822640  | -1.2944210 |
| C | 4.1682340  | 1.0785690  | -1.4886810 |
| C | 5.1375680  | 1.8396070  | -2.1520890 |
| C | 4.8298790  | 3.1075700  | -2.6369180 |
| C | 3.5643590  | 3.6355070  | -2.4091430 |
| H | 6.1406370  | 1.4263140  | -2.2842390 |
| H | 5.5798380  | 3.6889670  | -3.1765090 |
| H | 3.3209220  | 4.6384290  | -2.7664770 |
| C | 4.6127750  | -0.2325670 | -0.9138800 |
| C | 5.0053130  | -0.2803250 | 0.4370480  |
| C | 4.7202940  | -1.3782650 | -1.7191420 |
| C | 5.5453980  | -1.4636190 | 0.9487430  |
| C | 5.2671100  | -2.5442170 | -1.1722930 |
| C | 5.7048430  | -2.6013350 | 0.1525800  |
| H | 5.8691240  | -1.4925620 | 1.9938210  |
| H | 5.3569630  | -3.4324030 | -1.8047590 |
| C | 1.2793970  | 3.5913250  | -1.4612790 |
| C | 0.0672810  | 3.1283110  | -2.0180030 |
| C | 1.2775520  | 4.7663450  | -0.6777660 |
| C | -1.1055670 | 3.8513830  | -1.7893260 |
| C | 0.0736180  | 5.4484180  | -0.4586940 |
| C | -1.1292840 | 5.0131050  | -1.0129600 |
| H | -2.0368720 | 3.4920810  | -2.2367360 |
| H | 0.0831620  | 6.3513810  | 0.1591970  |
| C | 4.8520030  | 0.9333820  | 1.3194320  |
| H | 5.3428780  | 1.8139910  | 0.8777030  |
| H | 3.7882420  | 1.1956950  | 1.4434020  |
| H | 5.2888400  | 0.7561550  | 2.3119060  |
| C | 4.2250240  | -1.3491070 | -3.1393490 |
| H | 3.1641800  | -1.0553380 | -3.1460710 |
| H | 4.7734670  | -0.6110190 | -3.7439550 |
| H | 4.3294790  | -2.3319780 | -3.6200230 |
| C | 2.5370830  | 5.3269670  | -0.0581410 |
| H | 3.2496350  | 4.5401470  | 0.2235370  |
| H | 3.0635050  | 5.9980190  | -0.7547200 |
| H | 2.2928620  | 5.9185070  | 0.8358660  |
| C | -0.0109680 | 1.8754600  | -2.8521850 |
| H | 0.9400150  | 1.6481280  | -3.3517290 |
| H | -0.2713680 | 1.0057350  | -2.2275540 |
| H | -0.7921960 | 1.9716650  | -3.6191780 |
| C | -2.4175510 | 5.7618120  | -0.7927980 |
| H | -2.2791230 | 6.6071170  | -0.1049190 |

|   |            |            |            |
|---|------------|------------|------------|
| H | -2.8094380 | 6.1606530  | -1.7411450 |
| H | -3.1976080 | 5.1053360  | -0.3755120 |
| C | 6.3381500  | -3.8462670 | 0.7176060  |
| H | 6.2868320  | -4.6815590 | 0.0062760  |
| H | 7.3999400  | -3.6732900 | 0.9528370  |
| H | 5.8457940  | -4.1607170 | 1.6502120  |
| B | 1.7208080  | 0.6266040  | -0.7270130 |
| O | 0.8580910  | 1.0381710  | 0.2330680  |
| O | 1.5961490  | -0.6024350 | -1.3078750 |
| O | -0.8562470 | -0.8291720 | -0.0519190 |
| B | -2.0751760 | -1.2766830 | 0.1154280  |
| O | -2.8144030 | -0.9472980 | 1.2790510  |
| H | -3.7357510 | -1.2205320 | 1.2177780  |
| C | -2.8453620 | -2.2301790 | -0.9435230 |
| C | -4.1482190 | -1.9457240 | -1.4066560 |
| C | -2.2140710 | -3.3926830 | -1.4345200 |
| C | -4.7719740 | -2.7721840 | -2.3507490 |
| C | -2.8497060 | -4.2152690 | -2.3714440 |
| C | -4.1240610 | -3.9026730 | -2.8389230 |
| H | -5.7744320 | -2.5176850 | -2.7040020 |
| H | -2.3374330 | -5.1120790 | -2.7290970 |
| H | -4.6133520 | -4.5427470 | -3.5755450 |
| H | -1.6622840 | 0.1276860  | 2.5317340  |
| C | -0.7295390 | 0.6032360  | 2.8490660  |
| N | 0.2686910  | -0.0036420 | 3.4922340  |
| N | -0.3438650 | 1.8389500  | 2.5438900  |
| C | 1.3416450  | 0.8661180  | 3.5899400  |
| C | 0.2580950  | -1.3826990 | 4.0129280  |
| C | 0.9580040  | 2.0278020  | 2.9731080  |
| C | -1.0962500 | 2.8189410  | 1.7336800  |
| C | 2.6481500  | 0.4637140  | 4.1809770  |
| H | 1.2961040  | -1.7290540 | 3.9112610  |
| C | 1.7662360  | 3.2040560  | 2.5570460  |
| H | -0.3601080 | 3.1994280  | 1.0093170  |
| H | 3.3193660  | 1.3296760  | 4.2241110  |
| H | 2.5317050  | 0.0762980  | 5.2036340  |
| H | 3.1348540  | -0.3150030 | 3.5734690  |
| H | 1.2948730  | 4.1618880  | 2.8158400  |
| H | 2.7586040  | 3.1713560  | 3.0232700  |
| H | 1.8893450  | 3.1616630  | 1.4624740  |
| H | 0.1124790  | 0.3496420  | 0.2915300  |
| H | 0.7875120  | -1.0442280 | -0.9667510 |
| C | -0.8696590 | -3.7925790 | -0.9149970 |
| C | 0.2908230  | -3.4935470 | -1.6503230 |



|   |            |            |            |
|---|------------|------------|------------|
| C | -0.7748020 | -4.4469640 | 0.3242430  |
| C | 1.5368760  | -3.8288110 | -1.1176820 |
| C | 0.4895080  | -4.7884100 | 0.8149230  |
| C | 1.6562190  | -4.4760210 | 0.1159910  |
| H | 2.4405000  | -3.5588540 | -1.6718050 |
| H | 0.5641140  | -5.3047140 | 1.7769900  |
| C | -4.9032690 | -0.7516280 | -0.9062740 |
| C | -5.9555960 | -0.9196700 | 0.0166690  |
| C | -4.5617330 | 0.5372130  | -1.3546850 |
| C | -6.6393970 | 0.2067670  | 0.4834730  |
| C | -5.2823970 | 1.6366580  | -0.8776610 |
| C | -6.3225100 | 1.4947400  | 0.0431170  |
| H | -7.4462450 | 0.0735940  | 1.2100340  |
| H | -5.0225690 | 2.6355810  | -1.2400290 |
| C | -3.4321090 | 0.7362030  | -2.3311340 |
| H | -2.4548450 | 0.5699190  | -1.8490810 |
| H | -3.4954420 | 0.0246850  | -3.1673800 |
| H | -3.4466820 | 1.7551780  | -2.7414170 |
| C | -6.3385140 | -2.2926930 | 0.5139520  |
| H | -5.4588920 | -2.8778930 | 0.8238360  |
| H | -7.0292100 | -2.2218790 | 1.3647330  |
| H | -6.8330750 | -2.8803560 | -0.2743350 |
| C | -7.1078760 | 2.6869050  | 0.5229490  |
| H | -7.3568860 | 2.5998360  | 1.5901490  |
| H | -6.5495380 | 3.6215540  | 0.3755520  |
| H | -8.0575810 | 2.7772870  | -0.0280000 |
| C | 0.1867450  | -2.7717680 | -2.9679890 |
| H | -0.3640020 | -3.3690570 | -3.7106540 |
| H | -0.3641340 | -1.8259600 | -2.8457660 |
| H | 1.1819780  | -2.5410340 | -3.3691210 |
| C | -2.0104710 | -4.7461860 | 1.1352900  |
| H | -2.4815810 | -3.8159040 | 1.4933280  |
| H | -2.7689600 | -5.2743200 | 0.5382540  |
| H | -1.7680240 | -5.3648530 | 2.0107600  |
| C | 3.0117440  | -4.7790300 | 0.6961100  |
| H | 3.4279840  | -3.8812750 | 1.1804010  |
| H | 2.9590350  | -5.5793070 | 1.4481840  |
| H | 3.7240410  | -5.0827250 | -0.0844300 |
| C | -2.2189910 | 2.1475410  | 0.9634150  |
| H | -2.6918640 | 2.9038610  | 0.3233770  |
| H | -1.8329110 | 1.3368400  | 0.3309420  |
| H | -2.9916560 | 1.7331170  | 1.6284890  |
| C | -1.6134880 | 3.9513420  | 2.6124470  |
| H | -0.8150860 | 4.4359230  | 3.1910520  |

|   |            |            |           |
|---|------------|------------|-----------|
| H | -2.0808350 | 4.7152910  | 1.9744610 |
| H | -2.3727720 | 3.5780820  | 3.3166290 |
| C | -0.6345720 | -2.2732430 | 3.1645750 |
| H | -0.4095920 | -2.1555250 | 2.0934530 |
| H | -0.4664250 | -3.3203540 | 3.4519260 |
| H | -1.6978140 | -2.0425840 | 3.3195440 |
| C | -0.1348670 | -1.3814240 | 5.4855050 |
| H | -0.0679080 | -2.4010140 | 5.8899560 |
| H | 0.5188530  | -0.7305970 | 6.0837630 |
| H | -1.1715060 | -1.0317720 | 5.6031040 |

5

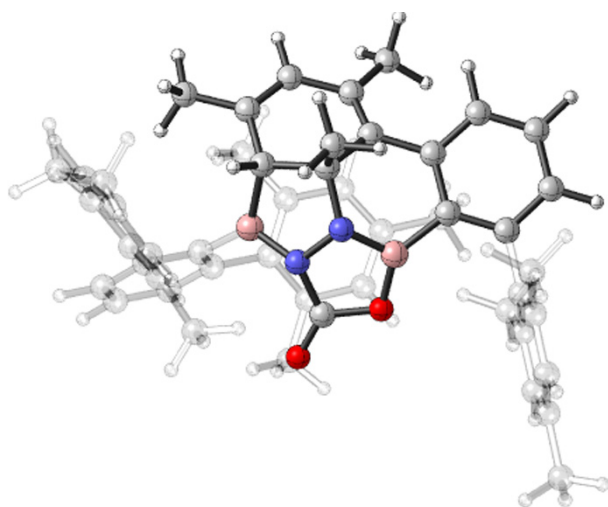

|   |            |            |            |
|---|------------|------------|------------|
| C | 1.7230620  | 0.3806710  | 1.4360580  |
| C | 0.2661330  | 0.7925820  | 1.7964070  |
| C | -0.5441640 | -0.2621920 | 2.5594160  |
| C | 0.1083530  | -1.2263360 | 3.2529570  |
| C | 1.5798470  | -1.2357060 | 3.2840710  |
| C | 2.3532690  | -0.5227710 | 2.4472680  |
| H | 2.0547590  | -1.9131250 | 4.0000140  |
| N | 0.4428010  | 0.5381600  | -0.5749400 |
| N | -0.3716770 | 0.9486380  | 0.4900400  |
| C | -2.0322130 | -0.1062770 | 2.4899500  |
| C | -2.8396590 | -0.3649860 | 3.6084380  |
| C | -2.6719190 | 0.3461500  | 1.2990730  |
| C | -4.2248060 | -0.2271780 | 3.5401370  |
| H | -2.3804740 | -0.6503320 | 4.5545080  |
| C | -4.0662070 | 0.4890540  | 1.2384730  |
| C | -4.8427030 | 0.1873660  | 2.3619810  |
| H | -4.8281380 | -0.4354290 | 4.4258940  |
| H | -5.9282180 | 0.2984320  | 2.3145450  |
| B | -1.6867170 | 0.6347940  | 0.1394330  |
| H | 2.3302100  | 1.3109380  | 1.4053350  |

|   |            |            |            |
|---|------------|------------|------------|
| C | -4.7015830 | 0.9960080  | -0.0178750 |
| C | -5.0059100 | 2.3658730  | -0.1366190 |
| C | -4.9652490 | 0.1161130  | -1.0809470 |
| C | -5.5827940 | 2.8304880  | -1.3198500 |
| C | -5.5446600 | 0.6209170  | -2.2494880 |
| C | -5.8623470 | 1.9724300  | -2.3881400 |
| H | -5.8183220 | 3.8945080  | -1.4127600 |
| H | -5.7499320 | -0.0653250 | -3.0753150 |
| B | 1.6880520  | -0.0080720 | -0.1366340 |
| C | 2.6921120  | -0.7222420 | -1.1241470 |
| C | 2.3894740  | -1.9909760 | -1.6736890 |
| C | 3.8756570  | -0.0635930 | -1.5178980 |
| C | 3.2651430  | -2.5763630 | -2.5917760 |
| C | 4.7314840  | -0.6655280 | -2.4474050 |
| C | 4.4291920  | -1.9147060 | -2.9809780 |
| H | 3.0254910  | -3.5576950 | -3.0070180 |
| H | 5.6384120  | -0.1408220 | -2.7553720 |
| H | 5.1027890  | -2.3748330 | -3.7060870 |
| C | 0.2364530  | 2.1151780  | 2.5631540  |
| H | -0.7978220 | 2.4206990  | 2.7826340  |
| H | 0.7761990  | 2.0005070  | 3.5151560  |
| H | 0.7204340  | 2.9047840  | 1.9684700  |
| C | -0.5406000 | -2.3617210 | 4.0016210  |
| H | 0.0695960  | -3.2707800 | 3.8905090  |
| H | -0.5914050 | -2.1516850 | 5.0830340  |
| H | -1.5550170 | -2.5813630 | 3.6478350  |
| C | 3.8463260  | -0.6004750 | 2.4508000  |
| H | 4.2122280  | -0.8604390 | 1.4447660  |
| H | 4.2876960  | 0.3799920  | 2.6960590  |
| H | 4.2177570  | -1.3474070 | 3.1656430  |
| C | -4.6988910 | 3.3198500  | 0.9895100  |
| H | -4.9606210 | 4.3501770  | 0.7146220  |
| H | -5.2525390 | 3.0572220  | 1.9033780  |
| H | -3.6295390 | 3.2946440  | 1.2514460  |
| C | -6.4750180 | 2.5078890  | -3.6555740 |
| H | -7.3790040 | 3.0970190  | -3.4414180 |
| H | -5.7718250 | 3.1705400  | -4.1831570 |
| H | -6.7502500 | 1.6956300  | -4.3414150 |
| C | -4.6115130 | -1.3432560 | -0.9693680 |
| H | -3.5222430 | -1.4724920 | -0.8700430 |
| H | -5.0768720 | -1.8005300 | -0.0831410 |
| H | -4.9397540 | -1.8977730 | -1.8590600 |
| C | -0.3948430 | 0.3568320  | -1.6827690 |
| O | -1.6834960 | 0.3788710  | -1.2431530 |

|   |            |            |            |
|---|------------|------------|------------|
| O | -0.0649660 | 0.2356620  | -2.8220350 |
| C | 4.2085520  | 1.2708920  | -0.9242750 |
| C | 3.4185440  | 2.4030310  | -1.2121250 |
| C | 5.2990940  | 1.3901690  | -0.0310680 |
| C | 3.6784500  | 3.6045200  | -0.5387510 |
| C | 5.5154760  | 2.6055840  | 0.6206530  |
| C | 4.7078690  | 3.7247680  | 0.3919350  |
| H | 3.0592850  | 4.4764510  | -0.7693950 |
| H | 6.3488460  | 2.6853170  | 1.3249740  |
| C | 1.1269540  | -2.6769560 | -1.2466270 |
| C | 1.0421040  | -3.2000040 | 0.0638420  |
| C | 0.0156220  | -2.7666660 | -2.1060470 |
| C | -0.1914610 | -3.6398460 | 0.5445010  |
| C | -1.2068620 | -3.2105150 | -1.5803400 |
| C | -1.3426530 | -3.6120510 | -0.2512390 |
| H | -0.2543980 | -4.0273470 | 1.5651600  |
| H | -2.0786350 | -3.2420080 | -2.2400910 |
| C | 2.2911740  | -3.4242410 | 0.8774280  |
| H | 2.0498590  | -3.6838490 | 1.9163530  |
| H | 2.8618370  | -4.2600210 | 0.4398360  |
| H | 2.9596040  | -2.5561200 | 0.8822910  |
| C | 0.1132950  | -2.4795930 | -3.5830800 |
| H | -0.8367020 | -2.0873740 | -3.9684960 |
| H | 0.8966710  | -1.7516810 | -3.8168030 |
| H | 0.3361470  | -3.4136960 | -4.1252750 |
| C | -2.6737340 | -4.0267730 | 0.3170770  |
| H | -3.4206570 | -4.1773510 | -0.4743340 |
| H | -2.5866800 | -4.9625060 | 0.8890010  |
| H | -3.0633530 | -3.2589400 | 1.0049110  |
| C | 6.2732110  | 0.2618640  | 0.2087100  |
| H | 5.8243240  | -0.7285910 | 0.0647940  |
| H | 7.1186670  | 0.3346820  | -0.4945770 |
| H | 6.6903860  | 0.3153390  | 1.2242570  |
| C | 2.3441840  | 2.4104050  | -2.2720590 |
| H | 2.6594020  | 3.0582450  | -3.1051730 |
| H | 2.1271410  | 1.4188000  | -2.6841160 |
| H | 1.4048490  | 2.8252180  | -1.8772100 |
| C | 4.9572710  | 5.0141100  | 1.1279340  |
| H | 4.6426270  | 4.9342750  | 2.1802390  |
| H | 6.0263350  | 5.2712460  | 1.1263270  |
| H | 4.4029420  | 5.8466230  | 0.6745310  |

DABCO.

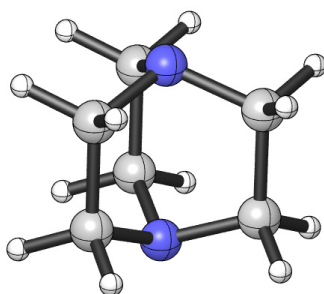

|   |            |            |            |
|---|------------|------------|------------|
| N | -1.2707520 | -0.0033700 | 0.0014580  |
| C | -0.7755700 | -1.2582540 | 0.5634480  |
| C | -0.7811290 | 0.1387420  | -1.3684680 |
| N | 1.2707930  | 0.0030190  | -0.0009210 |
| C | -0.7814600 | 1.1136820  | 0.8071220  |
| C | 0.7772560  | 1.1170740  | 0.8063850  |
| C | 0.7778300  | 0.1434690  | -1.3698030 |
| C | 0.7830560  | -1.2546190 | 0.5613140  |
| H | -1.1770910 | -1.3646070 | 1.5826460  |
| H | -1.1768470 | -2.0894750 | -0.0361160 |
| H | -1.1821050 | -0.6918160 | -1.9689640 |
| H | -1.1870090 | 1.0720400  | -1.7872810 |
| H | -1.1864370 | 2.0471530  | 0.3878660  |
| H | -1.1841680 | 1.0096620  | 1.8260950  |
| H | 1.1776470  | 2.0527850  | 0.3876690  |
| H | 1.1811860  | 1.0140230  | 1.8249670  |
| H | 1.1773710  | 1.0795820  | -1.7883710 |
| H | 1.1828480  | -0.6841020 | -1.9717120 |
| H | 1.1876930  | -1.3599210 | 1.5793820  |
| H | 1.1867240  | -2.0834250 | -0.0399310 |

[DABCO-H]<sup>+</sup>.

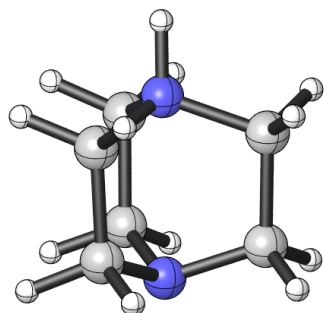

|   |           |           |            |
|---|-----------|-----------|------------|
| N | 1.2798370 | 0.0123150 | -0.0040990 |
| C | 0.8114050 | 0.8307800 | 1.1032510  |
| C | 0.8061410 | 0.5529800 | -1.2684030 |

|   |            |            |            |
|---|------------|------------|------------|
| N | -1.2148030 | -0.0118540 | 0.0037590  |
| C | 0.8297270  | -1.3610440 | 0.1577980  |
| C | -0.7205280 | -1.4237950 | 0.1355380  |
| C | -0.7457660 | 0.5866060  | -1.2907300 |
| C | -0.7401680 | 0.8173830  | 1.1618790  |
| H | -2.2396990 | -0.0231800 | 0.0071930  |
| H | 1.2297590  | 0.4415770  | 2.0401990  |
| H | 1.1798870  | 1.8560150  | 0.9708480  |
| H | 1.2097950  | 1.5648440  | -1.4000020 |
| H | 1.1872560  | -0.0701700 | -2.0874870 |
| H | 1.2460340  | -1.9739270 | -0.6516130 |
| H | 1.2146570  | -1.7543680 | 1.1071280  |
| H | -1.1180430 | -1.9826420 | -0.7201630 |
| H | -1.1518820 | -1.8313120 | 1.0577250  |
| H | -1.1559870 | 1.6025680  | -1.3392240 |
| H | -1.1808260 | -0.0128050 | -2.0995110 |
| H | -1.1345050 | 0.3501560  | 2.0721830  |
| H | -1.1865510 | 1.8125570  | 1.0491030  |

DBU

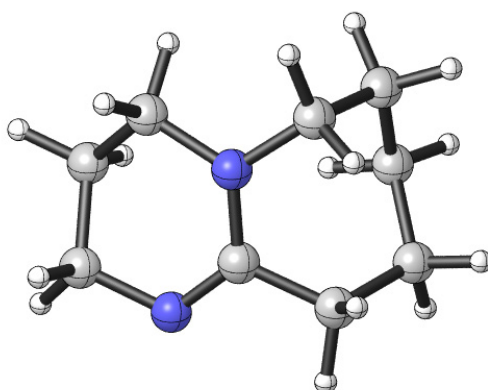

|   |            |            |            |
|---|------------|------------|------------|
| N | -0.2753860 | -0.5573980 | -0.5707810 |
| C | -0.3285180 | 0.8085810  | -0.3852190 |
| N | -1.3679800 | 1.4725510  | -0.0326630 |
| C | -2.5935010 | 0.7291310  | 0.1795070  |
| C | -2.3352700 | -0.6623990 | 0.7476340  |
| C | -1.3913270 | -1.4087780 | -0.1811820 |
| C | 0.9635570  | -1.2158260 | -0.9437820 |
| C | 1.9438920  | -1.3651610 | 0.2278180  |
| C | 1.9855580  | -0.1101420 | 1.0993760  |
| C | 2.1311560  | 1.2037490  | 0.3265840  |
| C | 0.9648880  | 1.5574030  | -0.6337470 |
| H | -3.2456930 | 1.3054950  | 0.8529410  |

|   |            |            |            |
|---|------------|------------|------------|
| H | -3.1426090 | 0.6372250  | -0.7769590 |
| H | -3.2690040 | -1.2291870 | 0.8704890  |
| H | -1.8726820 | -0.5594660 | 1.7424570  |
| H | -1.9347980 | -1.7553930 | -1.0791670 |
| H | -0.9920000 | -2.3063590 | 0.3186250  |
| H | 0.7093170  | -2.1998020 | -1.3647790 |
| H | 1.4427580  | -0.6562210 | -1.7588630 |
| H | 1.6604370  | -2.2278980 | 0.8519970  |
| H | 2.9439630  | -1.5869730 | -0.1790140 |
| H | 1.0660730  | -0.0642090 | 1.7050460  |
| H | 2.8143040  | -0.1955100 | 1.8186850  |
| H | 3.0764490  | 1.1903560  | -0.2394350 |
| H | 2.2296760  | 2.0128620  | 1.0645250  |
| H | 1.2666030  | 1.3908130  | -1.6784970 |
| H | 0.7081620  | 2.6188620  | -0.5458690 |

[DBU-H]<sup>+</sup>

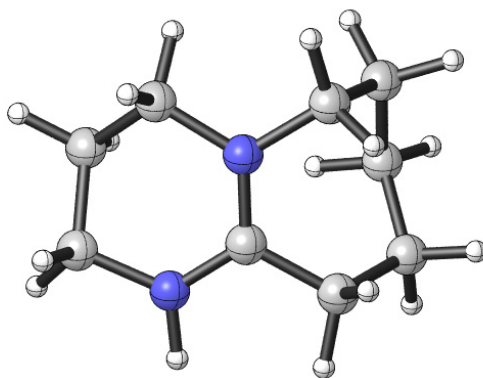

|   |            |            |            |
|---|------------|------------|------------|
| N | -0.2378980 | -0.5803370 | -0.5416120 |
| C | -0.2695350 | 0.7334760  | -0.4009640 |
| N | -1.3774750 | 1.3588880  | -0.0375640 |
| C | -2.6429290 | 0.6830290  | 0.2277730  |
| C | -2.3460520 | -0.7217020 | 0.7232980  |
| C | -1.4038360 | -1.4224000 | -0.2400710 |
| C | 1.0146800  | -1.2517030 | -0.9099120 |
| C | 1.9723720  | -1.3631850 | 0.2783760  |
| C | 2.0301150  | -0.0783310 | 1.1053190  |
| C | 2.1665330  | 1.2059450  | 0.2844140  |
| C | 0.9732730  | 1.5411180  | -0.6537400 |
| H | -1.3329950 | 2.3693510  | 0.0425760  |
| H | -3.1881450 | 1.2656620  | 0.9796770  |
| H | -3.2474440 | 0.6602180  | -0.6919740 |
| H | -3.2765470 | -1.2959610 | 0.8112570  |

|   |            |            |            |
|---|------------|------------|------------|
| H | -1.8878210 | -0.6693150 | 1.7222320  |
| H | -1.9110800 | -1.6719890 | -1.1853250 |
| H | -1.0274750 | -2.3573850 | 0.1961790  |
| H | 0.7483070  | -2.2385400 | -1.3085210 |
| H | 1.4794520  | -0.6943790 | -1.7330950 |
| H | 1.6749110  | -2.2013400 | 0.9262280  |
| H | 2.9679970  | -1.6109000 | -0.1194120 |
| H | 1.1299240  | -0.0080690 | 1.7382570  |
| H | 2.8753620  | -0.1388510 | 1.8049010  |
| H | 3.0826100  | 1.1620320  | -0.3220790 |
| H | 2.2983440  | 2.0433960  | 0.9819170  |
| H | 1.2488430  | 1.3770550  | -1.7054440 |
| H | 0.7056390  | 2.6016760  | -0.5700950 |

DMAP

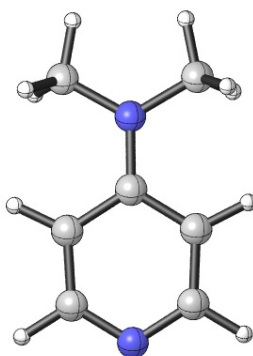

|   |            |            |            |
|---|------------|------------|------------|
| C | 0.5648320  | 1.1988270  | 0.0005710  |
| C | 1.9518820  | 1.1308550  | 0.0005890  |
| N | 2.6585070  | 0.0000030  | 0.0000000  |
| C | 1.9518910  | -1.1308540 | -0.0005850 |
| C | 0.5648410  | -1.1988380 | -0.0005710 |
| C | -0.1872830 | -0.0000070 | -0.0000070 |
| N | -1.5498720 | -0.0000020 | -0.0000230 |
| C | -2.2686590 | 1.2545090  | -0.0010160 |
| C | -2.2686850 | -1.2545000 | 0.0010290  |
| H | 0.0823590  | 2.1741980  | 0.0012490  |
| H | 2.5255820  | 2.0640300  | 0.0011480  |
| H | 2.5255990  | -2.0640240 | -0.0011390 |
| H | 0.0823790  | -2.1742130 | -0.0012370 |
| H | -2.0364680 | 1.8596870  | 0.8915610  |
| H | -2.0327940 | 1.8601350  | -0.8922900 |
| H | -3.3453210 | 1.0531540  | -0.0034700 |
| H | -2.0328650 | -1.8600810 | 0.8923470  |
| H | -3.3453420 | -1.0531200 | 0.0034320  |



H -2.0364780 -1.8597340 -0.8915040

[DMAP-H]<sup>+</sup>

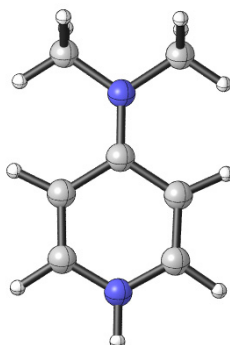

|   |            |            |            |
|---|------------|------------|------------|
| C | -0.5484480 | 1.2119500  | 0.0000000  |
| C | -1.9136180 | 1.1727230  | -0.0000080 |
| N | -2.5820500 | 0.0000170  | -0.0000050 |
| C | -1.9136660 | -1.1727100 | 0.0000040  |
| C | -0.5484930 | -1.2119960 | 0.0000100  |
| C | 0.2239660  | -0.0000390 | 0.0000060  |
| N | 1.5590800  | -0.0000140 | 0.0000110  |
| C | 2.3775350  | 1.2040060  | 0.0000030  |
| C | 2.3776400  | -1.2039660 | -0.0000130 |
| H | -3.5990630 | 0.0000390  | -0.0000030 |
| H | -0.0900410 | 2.1959110  | -0.0000020 |
| H | -2.5167880 | 2.0799760  | -0.0000170 |
| H | -2.5168690 | -2.0799420 | 0.0000060  |
| H | -0.0901490 | -2.1959850 | 0.0000160  |
| H | 1.7811360  | 2.1160120  | -0.0000790 |
| H | 3.0203120  | 1.2064490  | 0.8919710  |
| H | 3.0204350  | 1.2063440  | -0.8918770 |
| H | 1.7813410  | -2.1160300 | 0.0001320  |
| H | 3.0203620  | -1.2063700 | -0.8920220 |
| H | 3.0206030  | -1.2062290 | 0.8918220  |

NEt<sub>3</sub>

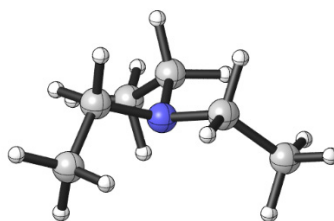

N -0.0010460 0.0008760 -0.0338200

|   |            |            |            |
|---|------------|------------|------------|
| C | -2.2792370 | 0.8635480  | 0.4443420  |
| C | -1.3971880 | 0.0048830  | -0.4497400 |
| C | 0.3889870  | -2.4035320 | 0.4424470  |
| C | 0.6948620  | -1.2096180 | -0.4497210 |
| C | 1.8943140  | 1.5331490  | 0.4409620  |
| C | 0.6990830  | 1.2107880  | -0.4436090 |
| H | -3.3273000 | 0.8217450  | 0.1135930  |
| H | -2.2242280 | 0.5057610  | 1.4824500  |
| H | -1.9725340 | 1.9197090  | 0.4351950  |
| H | -1.4941910 | 0.3276350  | -1.5101480 |
| H | -1.7689100 | -1.0295130 | -0.4133590 |
| H | 0.9527850  | -3.2894580 | 0.1155480  |
| H | 0.6644510  | -2.1758980 | 1.4821590  |
| H | -0.6786980 | -2.6673180 | 0.4276970  |
| H | 0.4669670  | -1.4538020 | -1.5111140 |
| H | 1.7764100  | -1.0149240 | -0.4100090 |
| H | 2.3718250  | 2.4709500  | 0.1215640  |
| H | 1.5696740  | 1.6419060  | 1.4857260  |
| H | 2.6603530  | 0.7449160  | 0.4058610  |
| H | 1.0146670  | 1.1462460  | -1.5088660 |
| H | -0.0088830 | 2.0505990  | -0.3876330 |

[HNEt<sub>3</sub>]<sup>+</sup>

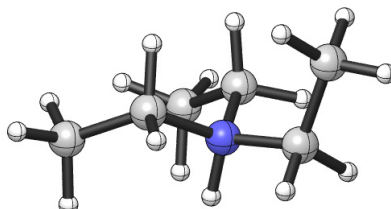

|   |            |            |            |
|---|------------|------------|------------|
| N | -0.4471010 | 0.0649330  | 0.0000000  |
| H | -1.2893400 | -0.5267340 | 0.0000000  |
| C | 0.2969990  | -1.7295570 | 1.6277650  |
| C | 0.2969990  | -0.2557180 | 1.2706760  |
| C | 0.1542210  | 2.5172510  | 0.0000000  |
| C | -0.9529240 | 1.4861920  | 0.0000000  |
| C | 0.2969990  | -1.7295570 | -1.6277650 |
| C | 0.2969990  | -0.2557180 | -1.2706760 |
| H | 0.6291040  | -1.8296680 | 2.6693880  |
| H | -0.7139830 | -2.1579210 | 1.5620070  |
| H | 0.9758130  | -2.3246390 | 1.0082870  |

|   |            |            |            |
|---|------------|------------|------------|
| H | 1.3131560  | 0.1427680  | 1.1559570  |
| H | -0.2059840 | 0.3194110  | 2.0588190  |
| H | -0.3070670 | 3.5135840  | 0.0000000  |
| H | 0.7864700  | 2.4495180  | 0.8955180  |
| H | 0.7864700  | 2.4495180  | -0.8955180 |
| H | -1.5894050 | 1.5811620  | -0.8892240 |
| H | -1.5894050 | 1.5811620  | 0.8892240  |
| H | 0.6291040  | -1.8296680 | -2.6693880 |
| H | 0.9758130  | -2.3246390 | -1.0082870 |
| H | -0.7139830 | -2.1579210 | -1.5620070 |
| H | -0.2059840 | 0.3194110  | -2.0588190 |
| H | 1.3131560  | 0.1427680  | -1.1559570 |

Py.

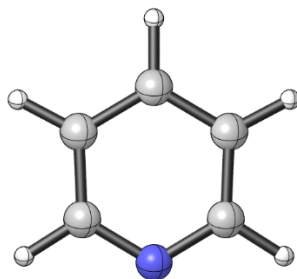

|   |            |            |            |
|---|------------|------------|------------|
| C | -1.1979880 | 0.6697270  | -0.0000040 |
| C | -1.1404700 | -0.7240360 | -0.0000180 |
| N | 0.0010160  | -1.4100650 | 0.0000110  |
| C | 1.1412630  | -0.7229470 | 0.0000040  |
| C | 1.1970300  | 0.6714000  | -0.0000050 |
| C | -0.0007860 | 1.3816500  | 0.0000060  |
| H | -2.1617430 | 1.1801220  | 0.0000100  |
| H | -2.0639830 | -1.3117270 | 0.0000240  |
| H | 2.0656590  | -1.3092670 | -0.0000130 |
| H | 2.1599970  | 1.1832930  | -0.0000230 |
| H | -0.0013370 | 2.4732720  | 0.0000250  |

[PyH]<sup>+</sup>

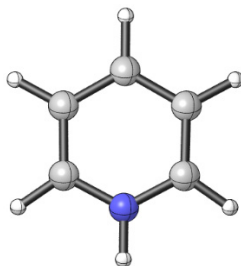

|   |           |            |           |
|---|-----------|------------|-----------|
| C | 0.7138220 | -1.2103810 | 0.0000000 |
|---|-----------|------------|-----------|

|   |            |            |            |
|---|------------|------------|------------|
| C | -0.6686300 | -1.1828090 | 0.0000010  |
| N | -1.3022390 | 0.0016440  | -0.0000010 |
| C | -0.6658710 | 1.1843630  | -0.0000010 |
| C | 0.7169550  | 1.2086710  | 0.0000010  |
| C | 1.4121150  | -0.0017140 | 0.0000010  |
| H | -2.3241680 | 0.0027020  | 0.0000000  |
| H | 1.2323570  | -2.1682020 | -0.0000050 |
| H | -1.2945470 | -2.0750150 | 0.0000030  |
| H | -1.2896060 | 2.0781450  | -0.0000010 |
| H | 1.2379920  | 2.1651280  | 0.0000030  |
| H | 2.5033020  | -0.0030420 | -0.0000040 |

**Table S3.** The NPA charges of **1**.

| Atom | No | Natural<br>Charge | Natural Population |         |         | Total   |
|------|----|-------------------|--------------------|---------|---------|---------|
|      |    |                   | Core               | Valence | Rydberg |         |
| C    | 1  | -0.61889          | 1.99914            | 4.59922 | 0.02053 | 6.61889 |
| C    | 2  | 0.11931           | 1.99923            | 3.85806 | 0.02341 | 5.88069 |
| C    | 3  | -0.03360          | 1.99886            | 4.01376 | 0.02097 | 6.03360 |
| C    | 4  | 0.00084           | 1.99898            | 3.98256 | 0.01762 | 5.99916 |
| C    | 5  | -0.29292          | 1.99895            | 4.27552 | 0.01845 | 6.29292 |
| C    | 6  | 0.10554           | 1.99910            | 3.87798 | 0.01737 | 5.89446 |
| H    | 7  | 0.20324           | 0.00000            | 0.79493 | 0.00182 | 0.79676 |
| N    | 8  | -0.80027          | 1.99926            | 5.76956 | 0.03146 | 7.80027 |
| N    | 9  | -0.53803          | 1.99925            | 5.51240 | 0.02638 | 7.53803 |
| C    | 10 | -0.01175          | 1.99905            | 3.99256 | 0.02014 | 6.01175 |
| C    | 11 | -0.22086          | 1.99911            | 4.20370 | 0.01805 | 6.22086 |
| C    | 12 | -0.40260          | 1.99891            | 4.37915 | 0.02454 | 6.40260 |
| C    | 13 | -0.20969          | 1.99921            | 4.19314 | 0.01734 | 6.20969 |
| H    | 14 | 0.22142           | 0.00000            | 0.77713 | 0.00144 | 0.77858 |
| C    | 15 | -0.01810          | 1.99904            | 3.99663 | 0.02244 | 6.01810 |
| C    | 16 | -0.22709          | 1.99912            | 4.20986 | 0.01811 | 6.22709 |
| H    | 17 | 0.22121           | 0.00000            | 0.77778 | 0.00102 | 0.77879 |
| H    | 18 | 0.21920           | 0.00000            | 0.77951 | 0.00130 | 0.78080 |
| B    | 19 | 0.91369           | 1.99854            | 2.06050 | 0.02727 | 4.08631 |
| H    | 20 | 0.24504           | 0.00000            | 0.75234 | 0.00262 | 0.75496 |
| C    | 21 | 0.13762           | 1.99894            | 3.84528 | 0.01815 | 5.86238 |
| C    | 22 | 0.13440           | 1.99892            | 3.84877 | 0.01790 | 5.86560 |
| C    | 23 | -0.03016          | 1.99933            | 4.01603 | 0.01479 | 6.03016 |
| H    | 24 | 0.20860           | 0.00000            | 0.78930 | 0.00210 | 0.79140 |
| C    | 25 | -0.02962          | 1.99934            | 4.01507 | 0.01520 | 6.02962 |
| H    | 26 | 0.21251           | 0.00000            | 0.78528 | 0.00222 | 0.78749 |

|   |    |          |         |         |         |         |
|---|----|----------|---------|---------|---------|---------|
| N | 27 | -0.30852 | 1.99932 | 5.28456 | 0.02464 | 7.30852 |
| N | 28 | -0.29866 | 1.99932 | 5.27390 | 0.02544 | 7.29866 |
| C | 29 | 0.18907  | 1.99895 | 3.78341 | 0.02856 | 5.81093 |
| C | 30 | -0.06186 | 1.99891 | 4.04204 | 0.02091 | 6.06186 |
| C | 31 | 0.00729  | 1.99909 | 3.97480 | 0.01882 | 5.99271 |
| C | 32 | -0.00019 | 1.99908 | 3.98263 | 0.01848 | 6.00019 |
| C | 33 | -0.22974 | 1.99903 | 4.21414 | 0.01657 | 6.22974 |
| C | 34 | -0.23050 | 1.99904 | 4.21503 | 0.01642 | 6.23050 |
| C | 35 | -0.01489 | 1.99916 | 3.99847 | 0.01726 | 6.01489 |
| H | 36 | 0.21243  | 0.00000 | 0.78609 | 0.00148 | 0.78757 |
| H | 37 | 0.21109  | 0.00000 | 0.78740 | 0.00150 | 0.78891 |
| B | 38 | 0.88023  | 1.99897 | 2.08954 | 0.03126 | 4.11977 |
| C | 39 | -0.34171 | 1.99888 | 4.31857 | 0.02426 | 6.34171 |
| C | 40 | -0.02039 | 1.99905 | 4.00059 | 0.02076 | 6.02039 |
| C | 41 | -0.01895 | 1.99906 | 3.99899 | 0.02090 | 6.01895 |
| C | 42 | -0.22270 | 1.99911 | 4.20597 | 0.01762 | 6.22270 |
| C | 43 | -0.22417 | 1.99910 | 4.20710 | 0.01798 | 6.22417 |
| C | 44 | -0.22098 | 1.99920 | 4.20412 | 0.01766 | 6.22098 |
| H | 45 | 0.21664  | 0.00000 | 0.78203 | 0.00134 | 0.78336 |
| H | 46 | 0.21729  | 0.00000 | 0.78132 | 0.00139 | 0.78271 |
| H | 47 | 0.21881  | 0.00000 | 0.78015 | 0.00104 | 0.78119 |
| C | 48 | -0.61145 | 1.99941 | 4.59798 | 0.01407 | 6.61145 |
| H | 49 | 0.21117  | 0.00000 | 0.78745 | 0.00138 | 0.78883 |
| H | 50 | 0.21560  | 0.00000 | 0.78342 | 0.00098 | 0.78440 |
| H | 51 | 0.23080  | 0.00000 | 0.76773 | 0.00146 | 0.76920 |
| C | 52 | -0.64191 | 1.99944 | 4.63031 | 0.01216 | 6.64191 |
| H | 53 | 0.21666  | 0.00000 | 0.78213 | 0.00121 | 0.78334 |
| H | 54 | 0.22328  | 0.00000 | 0.77557 | 0.00115 | 0.77672 |
| H | 55 | 0.22559  | 0.00000 | 0.77346 | 0.00095 | 0.77441 |
| C | 56 | -0.63472 | 1.99941 | 4.62258 | 0.01272 | 6.63472 |
| H | 57 | 0.23026  | 0.00000 | 0.76814 | 0.00159 | 0.76974 |
| H | 58 | 0.21658  | 0.00000 | 0.78201 | 0.00141 | 0.78342 |
| H | 59 | 0.21397  | 0.00000 | 0.78489 | 0.00114 | 0.78603 |
| C | 60 | -0.63853 | 1.99944 | 4.62668 | 0.01241 | 6.63853 |
| H | 61 | 0.21866  | 0.00000 | 0.78047 | 0.00086 | 0.78134 |
| H | 62 | 0.23035  | 0.00000 | 0.76841 | 0.00123 | 0.76965 |
| H | 63 | 0.22819  | 0.00000 | 0.77050 | 0.00131 | 0.77181 |
| C | 64 | -0.62807 | 1.99945 | 4.61705 | 0.01156 | 6.62807 |
| H | 65 | 0.22248  | 0.00000 | 0.77656 | 0.00096 | 0.77752 |
| H | 66 | 0.22153  | 0.00000 | 0.77732 | 0.00115 | 0.77847 |
| H | 67 | 0.21787  | 0.00000 | 0.78127 | 0.00086 | 0.78213 |
| C | 68 | -0.63324 | 1.99944 | 4.62157 | 0.01224 | 6.63324 |
| H | 69 | 0.22020  | 0.00000 | 0.77842 | 0.00137 | 0.77980 |
| H | 70 | 0.22849  | 0.00000 | 0.77035 | 0.00116 | 0.77151 |

|   |     |          |         |         |         |         |
|---|-----|----------|---------|---------|---------|---------|
| H | 71  | 0.21968  | 0.00000 | 0.77940 | 0.00092 | 0.78032 |
| C | 72  | -0.65108 | 1.99942 | 4.63896 | 0.01271 | 6.65108 |
| H | 73  | 0.23556  | 0.00000 | 0.76341 | 0.00103 | 0.76444 |
| H | 74  | 0.23732  | 0.00000 | 0.76180 | 0.00088 | 0.76268 |
| H | 75  | 0.23165  | 0.00000 | 0.76701 | 0.00135 | 0.76835 |
| C | 76  | -0.65251 | 1.99942 | 4.64012 | 0.01298 | 6.65251 |
| H | 77  | 0.23723  | 0.00000 | 0.76189 | 0.00088 | 0.76277 |
| H | 78  | 0.23711  | 0.00000 | 0.76158 | 0.00131 | 0.76289 |
| H | 79  | 0.23199  | 0.00000 | 0.76682 | 0.00119 | 0.76801 |
| C | 80  | -0.05533 | 1.99892 | 4.03620 | 0.02021 | 6.05533 |
| C | 81  | 0.00486  | 1.99909 | 3.97871 | 0.01734 | 5.99514 |
| C | 82  | 0.02689  | 1.99908 | 3.95643 | 0.01761 | 5.97311 |
| C | 83  | -0.22798 | 1.99904 | 4.21300 | 0.01595 | 6.22798 |
| C | 84  | -0.23866 | 1.99903 | 4.22267 | 0.01696 | 6.23866 |
| C | 85  | -0.02481 | 1.99914 | 4.00848 | 0.01718 | 6.02481 |
| H | 86  | 0.20747  | 0.00000 | 0.79116 | 0.00137 | 0.79253 |
| H | 87  | 0.20234  | 0.00000 | 0.79522 | 0.00244 | 0.79766 |
| C | 88  | -0.05725 | 1.99892 | 4.03758 | 0.02074 | 6.05725 |
| C | 89  | 0.01319  | 1.99908 | 3.96912 | 0.01861 | 5.98681 |
| C | 90  | 0.00104  | 1.99908 | 3.98127 | 0.01861 | 5.99896 |
| C | 91  | -0.23050 | 1.99903 | 4.21547 | 0.01600 | 6.23050 |
| C | 92  | -0.22883 | 1.99904 | 4.21301 | 0.01678 | 6.22883 |
| C | 93  | -0.01561 | 1.99916 | 3.99945 | 0.01701 | 6.01561 |
| H | 94  | 0.20813  | 0.00000 | 0.79021 | 0.00166 | 0.79187 |
| H | 95  | 0.20929  | 0.00000 | 0.78921 | 0.00151 | 0.79071 |
| C | 96  | -0.63571 | 1.99944 | 4.62414 | 0.01213 | 6.63571 |
| H | 97  | 0.22485  | 0.00000 | 0.77398 | 0.00117 | 0.77515 |
| H | 98  | 0.21776  | 0.00000 | 0.78138 | 0.00087 | 0.78224 |
| H | 99  | 0.22440  | 0.00000 | 0.77418 | 0.00141 | 0.77560 |
| C | 100 | -0.62700 | 1.99945 | 4.61604 | 0.01150 | 6.62700 |
| H | 101 | 0.21624  | 0.00000 | 0.78291 | 0.00085 | 0.78376 |
| H | 102 | 0.21908  | 0.00000 | 0.77992 | 0.00100 | 0.78092 |
| H | 103 | 0.22194  | 0.00000 | 0.77691 | 0.00115 | 0.77806 |
| C | 104 | -0.64509 | 1.99944 | 4.63314 | 0.01251 | 6.64509 |
| H | 105 | 0.21034  | 0.00000 | 0.78869 | 0.00097 | 0.78966 |
| H | 106 | 0.22492  | 0.00000 | 0.77390 | 0.00118 | 0.77508 |
| H | 107 | 0.24573  | 0.00000 | 0.75216 | 0.00211 | 0.75427 |
| C | 108 | -0.64336 | 1.99945 | 4.63140 | 0.01251 | 6.64336 |
| H | 109 | 0.23009  | 0.00000 | 0.76907 | 0.00084 | 0.76991 |
| H | 110 | 0.22303  | 0.00000 | 0.77591 | 0.00106 | 0.77697 |
| H | 111 | 0.22222  | 0.00000 | 0.77671 | 0.00107 | 0.77778 |
| C | 112 | -0.63079 | 1.99945 | 4.61954 | 0.01180 | 6.63079 |
| H | 113 | 0.21439  | 0.00000 | 0.78471 | 0.00090 | 0.78561 |
| H | 114 | 0.22398  | 0.00000 | 0.77504 | 0.00097 | 0.77602 |

|   |     |          |         |         |         |         |
|---|-----|----------|---------|---------|---------|---------|
| H | 115 | 0.21807  | 0.00000 | 0.78074 | 0.00119 | 0.78193 |
| C | 116 | -0.66356 | 1.99943 | 4.65241 | 0.01172 | 6.66356 |
| H | 117 | 0.20092  | 0.00000 | 0.79755 | 0.00153 | 0.79908 |
| H | 118 | 0.27182  | 0.00000 | 0.72558 | 0.00260 | 0.72818 |
| H | 119 | 0.22212  | 0.00000 | 0.77617 | 0.00171 | 0.77788 |
| C | 120 | -0.62738 | 1.99944 | 4.61433 | 0.01360 | 6.62738 |
| H | 121 | 0.22014  | 0.00000 | 0.77715 | 0.00271 | 0.77986 |
| H | 122 | 0.25828  | 0.00000 | 0.73896 | 0.00276 | 0.74172 |
| H | 123 | 0.22483  | 0.00000 | 0.77424 | 0.00094 | 0.77517 |
| C | 124 | -0.62035 | 1.99945 | 4.60763 | 0.01327 | 6.62035 |
| H | 125 | 0.21976  | 0.00000 | 0.77941 | 0.00082 | 0.78024 |
| H | 126 | 0.21015  | 0.00000 | 0.78885 | 0.00100 | 0.78985 |
| H | 127 | 0.23265  | 0.00000 | 0.76590 | 0.00145 | 0.76735 |
| C | 128 | -0.62349 | 1.99944 | 4.61071 | 0.01333 | 6.62349 |
| H | 129 | 0.23610  | 0.00000 | 0.76135 | 0.00256 | 0.76390 |
| H | 130 | 0.22314  | 0.00000 | 0.77572 | 0.00114 | 0.77686 |
| H | 131 | 0.22445  | 0.00000 | 0.77472 | 0.00083 | 0.77555 |
| C | 132 | -0.62545 | 1.99944 | 4.61143 | 0.01458 | 6.62545 |
| H | 133 | 0.22982  | 0.00000 | 0.76878 | 0.00140 | 0.77018 |
| H | 134 | 0.24191  | 0.00000 | 0.75498 | 0.00311 | 0.75809 |
| H | 135 | 0.21544  | 0.00000 | 0.78371 | 0.00085 | 0.78456 |

---



---

\* Total \*      0.00000      129.94603      330.78940      1.26458      462.00000

**Table S4.** Comparison of the basicity of **1** with typical bases.

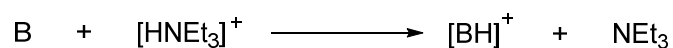

| Species                           | Sum of electronic and thermal Enthalpies (Hartree) | $\Delta H$ (kcal/mol) |
|-----------------------------------|----------------------------------------------------|-----------------------|
| NEt <sub>3</sub>                  | -291.823482                                        | 0                     |
| [HNEt <sub>3</sub> ] <sup>+</sup> | -292.241923                                        |                       |
| Py                                | -247.901192                                        | 7.4                   |
| [Py-H] <sup>+</sup>               | -248.307898                                        |                       |
| DABCO                             | -344.729960                                        | -0.4                  |
| [DABCO-H] <sup>+</sup>            | -345.149102                                        |                       |
| DMAP                              | -381.639614                                        | -3.5                  |
| [DMAP-H] <sup>+</sup>             | -382.063603                                        |                       |
| DBU                               | -461.287903                                        | -16.2                 |
| [DBU-H] <sup>+</sup>              | -461.732175                                        |                       |
| <b>1</b>                          | -2555.114983                                       | -37.4                 |
| [ <b>1-H</b> ] <sup>+</sup>       | -2555.593102                                       |                       |

## References

- S1 C. Bergquist, B. M. Bridgewater, C. Jeff Harlan, J. R. Norton, R. A. Friesner and G. Parkin, *J. Am. Chem. Soc.*, 2000, **122**, 10581–10590.
- S2 R. Guo, X. Huang, M. Zhao, Y. Lei, Z. Ke and L. Kong, *Inorg. Chem.*, 2019, **58**, 13370–13375.
- S3 Rigaku Oxford Diffraction. CrysAlisPro Software system, version 1.171.40.25a, Rigaku Corporation: Oxford, UK, 2018.
- S4 G. M. Sheldrick, *Acta Cryst. A.*, 2015, **1**, 3–8.
- S5 G. M. Sheldrick, *Acta Cryst. C.*, 2015, **71**, 3–8.
- S6 G. M. Sheldrick, *Acta Cryst. A.*, 2008, **64**, 112–122.
- S7 O. V. Dolomanov, L. J. Bourhis, R. J. Gildea, J. A. K. Howard and H. Puschmann, *J. Appl. Cryst.*, 2009, **42**, 339–341.
- S8 M. J. Frisch, G. W. Trucks, H. B. Schlegel, G. E. Scuseria, M. A. Robb, J. R. Cheeseman, G. Scalmani, V. Barone, B. Mennucci, G. A. Petersson, H. Nakatsuji, M. Caricato, X. Li, H. P. Hratchian, A. F. Izmaylov, J. Bloino, G. Zheng, J. L. Sonnenberg, M. Hada, M. Ehara, K. Toyota, R. Fukuda, J. Hasegawa, M. Ishida, T. Nakajima, Y. Honda, O. Kitao, H. Nakai, T. Vreven, J. A. Montgomery Jr., J. E. Peralta, F. Ogliaro, M. Bearpark, J. J. Heyd, E. Brothers, K. N. Kudin, V. N. Staroverov, R. Kobayashi, J. Normand, K. Raghavachari, A. Rendell, J. C. Burant, S. S. Iyengar, J. Tomasi, M. Cossi, N. Rega, J. M. Millam, M. Klene, J. E. Knox, J. B. Cross, V. Bakken, C. Adamo, J. Jaramillo, R. Gomperts, R. E. Stratmann, O. Yazyev, A. J. Austin, R. Cammi, C. Pomelli, J. W. Ochterski, R. L. Martin, K. Morokuma, V. G. Zakrzewski, G. A. Voth, P. Salvador, J. J. Dannenberg, S. Dapprich, A. D. Daniels, Ö. Farkas, J. B. Foresman, J. V. Ortiz, J. Cioslowski and D. J. Fox, Gaussian 16, revision A.03; Gaussian, Inc.: Wallingford, CT, 2016.
- S9 Y. Zhao and D. G. Truhlar, *Theor. Chem. Acc.*, 2008, **120**, 215–241.
- S10 A. V. Marenich, C. J. Cramer and D. G. Truhlar, *J. Phys. Chem. B.*, 2009, **113**, 6378–6396.
- S11 D. H. Wertz, *J. Am. Chem. Soc.*, 1980, **102**, 5316–5322.
- S12 B. O. Leung, D. L. Reid, D. A. Armstrong and A. Rauk, *J. Phys. Chem. A.*, 2004, **108**, 2720–2725.
- S13 Z.-X. Yu and K. N. Houk, *J. Am. Chem. Soc.*, 2003, **125**, 13825–13830.
- S14 Y. Liang, S. Liu, Y. Xia, Y. Li, and Z.-X. Yu, *Chem. –Eur. J.*, 2008, **14**, 4361–4373.
- S15 R. E. Plata and D. A. Singleton, *J. Am. Chem. Soc.*, 2015, **137**, 3811–3826.
